1 **Mitofusins *Mfn1* and *Mfn2* are required to preserve glucose- but not incretin-**  
2 **stimulated beta cell connectivity and insulin secretion**

3  
4 Eleni Georgiadou<sup>1</sup>, Charanya Muralidharan<sup>2</sup>, Michelle Martinez<sup>2</sup>, Pauline  
5 Chabosseau<sup>1</sup>, Alejandra Tomas<sup>1</sup>, Fiona Yong Su Wern<sup>3</sup>, Elina Akalestou<sup>1</sup>  
6 Theodoros Stylianides<sup>4</sup>, Asger Wretling<sup>5</sup>, Cristina Legido-Quigley<sup>5,6</sup>, Ben Jones<sup>7</sup>,  
7 Livia Lopez Noriega<sup>1</sup>, Yanwen Xu<sup>8</sup>, Guoqiang Gu<sup>8</sup>, Nour Alsabeeh<sup>9</sup>, Céline Cruciani-  
8 Guglielmacci<sup>10</sup>, Christophe Magnan<sup>10</sup>, Mark Ibberson<sup>11</sup>, Isabelle Leclerc<sup>1</sup>, Yusuf Ali<sup>3</sup>,  
9 Scott A. Soleimanpour<sup>12,13</sup> Amelia K. Linnemann<sup>2</sup>, Tristan A. Rodriguez<sup>14</sup>  
10 and Guy A. Rutter<sup>1,3,15\*</sup>.

11

12 <sup>1</sup>Section of Cell Biology and Functional Genomics, Division of Diabetes, Endocrinology and  
13 Metabolism, Department of Medicine, Imperial College London, London, W12 0NN, UK

14 <sup>2</sup>Center for Diabetes and Metabolic Diseases, Indiana University School of Medicine,  
15 Indianapolis, IN, 46202, USA

16 <sup>3</sup>Lee Kong Chian School of Medicine, Nanyang Technological University, 637553, Singapore

17 <sup>4</sup>Loughborough University, Centre of Innovative and Collaborative Construction Engineering,  
18 Leicestershire, LE11 3TU, UK

19 <sup>5</sup>Systems Medicin, Steno Diabetes Center Copenhagen, 2820, Denmark

20 <sup>6</sup> Institute of Pharmaceutical Science, Kings College London, London, SE1 9NH, UK

21 <sup>7</sup> Section of Endocrinology and Investigative Medicine, Imperial College London, W12 0NN,UK

22 <sup>8</sup>Department of Cell and Developmental Biology, Program of Developmental Biology, and  
23 Vanderbilt Center for Stem Cell Biology. Vanderbilt University, School of Medicine, Nashville,  
24 TN, 37232, USA.

25 <sup>9</sup>Kuwait University, Department of Physiology, Health Sciences Center, 13110, Kuwait

26 <sup>10</sup>Université de Paris, BFA, UMR 8251, CNRS, Regulation of Glycemia by Central Nervous  
27 System, Paris, 75205, France

28 <sup>11</sup>Vital-IT Group, SIB Swiss Institute of Bioinformatics, Lausanne, CH-1015, Switzerland

29 <sup>12</sup>Division of Metabolism, Endocrinology & Diabetes and Department of Internal Medicine,  
30 University of Michigan Medical School, Ann Arbor, MI 48105, USA

31 <sup>13</sup>VA Ann Arbor Healthcare System, Ann Arbor, MI 48105, USA

32 <sup>14</sup>National Heart and Lung Institute, Imperial Centre for Translational and Experimental  
33 Medicine, Imperial College London, London, W12 0NN, UK

34 <sup>15</sup>Centre of research of CHUM, University of Montreal, Quebec, H2X 0A9, Canada

35

36

37 \*Address correspondence to Professor Guy A. Rutter, [g.rutter@imperial.ac.uk](mailto:g.rutter@imperial.ac.uk), +44 20 759  
38 43340

39

40 **Word count:** 4341

41 **Abstract**

42 **Aims/hypothesis** Mitochondrial glucose metabolism is essential for stimulated insulin  
43 release from pancreatic beta cells. Whether mitochondrial networks may be important  
44 for glucose or incretin sensing has yet to be determined.

45 **Methods** Here, we generated mice with beta cell-selective, adult-restricted deletion of  
46 the mitofusin genes *Mfn1* and *Mfn2* ( $\beta$ *Mfn1/2* dKO). Whole or dissociated pancreatic  
47 islets were used for live beta cell fluorescence imaging of cytosolic or mitochondrial  
48  $Ca^{2+}$  concentration and ATP production or GSIS in response to increasing glucose  
49 concentrations or GLP-1 receptor agonists. Serum and blood samples were collected  
50 to examine oral and i.p. glucose tolerance.

51 **Results**  $\beta$ *Mfn1/2* dKO mice displayed elevated fed and fasted glycaemia ( $p < 0.01$ ,  
52  $p < 0.001$ ) and a >five-fold decrease ( $p < 0.0001$ ) in plasma insulin. Mitochondrial length,  
53 glucose-induced polarisation, ATP synthesis and cytosolic  $Ca^{2+}$  increases were all  
54 reduced ( $p < 0.05$ ,  $p < 0.01$ ,  $p < 0.0001$ ) in dKO islets, and beta cell  $Ca^{2+}$  dynamics were  
55 suppressed *in vivo* ( $p < 0.001$ ). In contrast, oral glucose tolerance was near normal in  
56  $\beta$ *Mfn1/2* dKO mice ( $p < 0.05$ ,  $p < 0.01$ ) and GLP-1 or GIP receptor agonists largely  
57 corrected defective GSIS from isolated islets through an EPAC-dependent signalling  
58 activation.

59 **Conclusions/interpretation** Mitochondrial fusion and fission cycles are thus essential  
60 in the beta cell to maintain normal glucose, but not incretin, sensing. Defects in these  
61 cycles in some forms of diabetes might therefore provide opportunities for novel  
62 incretin-based or other therapies.

63  
64 **Keywords:**  $Ca^{2+}$  dynamics; exendin-4; glucose-stimulated insulin secretion; incretins;  
65 intercellular connectivity; mitochondrial dysfunction; mitofusins; pancreatic beta cell;  
66 Type 2 diabetes.

67 **Graphical abstract**

68

69

70 **Figure legend**

71 Impact of *Mfn1/2* deletion on glucose and incretin stimulated-insulin secretion in beta cells. (A)

72 In control animals, glucose is taken up by beta cells through GLUT2 and metabolised by

73 mitochondria (elongated structure) through the citrate (TCA) cycle, leading to an increased

74 mitochondrial proton motive force (hyperpolarised  $\Delta\psi_m$ ), accelerated ATP synthesis and  $O_2$

75 consumption rate (OCR). Consequently, the cytoplasmic ATP:ADP ratio rises, which causes

76 closure of  $K_{ATP}$  channels, depolarisation of plasma membrane potential ( $\psi_m$ ), opening of

77 VDCCs and influx of cytosolic  $Ca^{2+}$ . Elevated  $[Ca^{2+}]_{cyt}$  triggers a number of ATP-dependent

78 processes including insulin secretion and improved beta-beta cell communication through

79 connexin 36 (Cx36). (B) Following *Mfn1/2* deletion ( $\beta$ *Mfn1/2* dKO), highly fragmented

80 mitochondria were associated with reduced mitochondrial  $Ca^{2+}$  ( $[Ca^{2+}]_m$ ) accumulation,

81 leading to a less polarised  $\Delta\psi_m$ , weaker OCR, lower mtDNA copy number and decreased ATP

82 synthesis. This is expected to result in weaker  $\psi_m$  depolarisation, cytosolic  $Ca^{2+}$  influx and

83 beta-beta cell connectivity due to lower expression of Cx36. Despite observing a higher

84 number of docked insulin granules on the plasma membrane, insulin secretion was highly

85 suppressed in these animals. This was also associated with increased beta cell death and

86 reduced beta cell mass. (C) In response to incretins, insulin secretion is potentiated through

87 the activation of GLP1-R and cAMP signalling involving PKA- and EPAC2-dependent

88 pathways. Elevated  $[Ca^{2+}]_{cyt}$  triggers a number of ATP-dependent processes including insulin

89 secretion and  $Ca^{2+}$  removal into the endoplasmic reticulum (ER). (D) In  $\beta$ *Mfn1/2* dKO cells,

90 activation of the GLP1-R was shown to be linked with a potentiation of the EPAC2 pathway

91 that is PKA independent, along with an increased ER  $Ca^{2+}$  uptake and improved beta-beta cell

92 communication. How these 'amplifying' signals of glucose metabolism for insulin secretion are

93 linked with fragmented mitochondria remains unknown. Red and bold arrows represent

94 enhanced pathways; dashed arrows represent impaired pathways. This figure was produced

95 using illustrations from Servier Medical Art, <http://smart.servier.com/>

96 **List of abbreviations**

97  $[Ca^{2+}]_{cyt}$ : Cytoplasmic  $Ca^{2+}$  concentration

98  $[Ca^{2+}]_{mito}$ : Mitochondrial free  $Ca^{2+}$  concentration

99 AA: Antimycin A

100 Ach: Acetylcholine

101 *Clec16a*<sup>Δpanc</sup>: Pancreatic islet specific Clec16a knock-out

102 Diaz: Diazoxide

103 dKO: double knock-out

104 Ex4: Exendin-4

105 FCCP: Carbonyl cyanide-4-phenylhydrazone

106 GIP: Glucose-dependent insulinotropic peptide

107 GLP-1: Glucagon-like peptide-1

108 GSIS: Glucose-stimulated insulin secretion

109 IMM: Inner mitochondria membrane

110 IPGTT: Intraperitoneal glucose tolerance test

111 OGTT: Oral gavage and glucose tolerance test

112 Oligo: Oligomycin

113 OMM: Outer mitochondrial membrane

114 r: Pearson correlation coefficient

115 Rot: Rotenone

116 TMRE: Tetramethylrhodamine ethyl ester

117  $\beta Mfn1/2$  dKO: beta cell specific Mitofusin 1 and 2 double knock-out

118  $\Delta\psi_m$ : Mitochondrial membrane potential

119 **Research in context**

120 **What is already known about this subject?**

- 121 • Mitochondrial ultrastructural variations and number are altered in beta cells of  
122 human T2D patients [1].
- 123 • Mice lacking *Opa1*, which controls mitochondrial fusion and inner membrane  
124 cristae structure, in beta cells, develop hyperglycaemia and defects in GSIS [2].

125 **What is the key question?**

- 126 • Is an interconnected mitochondrial network essential in primary mouse beta  
127 cells for normal insulin secretion and glucose homeostasis?

128 **What are the new findings?**

- 129 • We generated mice with beta cell-selective, adult-restricted deletion of the  
130 mitofusin genes *Mfn1* and *Mfn2* and show that insulin secretion and glucose  
131 homeostasis are strongly reduced *in vivo*.
- 132 • Cytosolic and mitochondrial  $Ca^{2+}$  increases,  $\Delta\psi_m$ , ATP production and beta cell  
133 connectivity are impaired in  $\beta Mfn1/2$  dKO animals.
- 134 • Incretins bypass the above defects through an exchange protein directly  
135 activated by cAMP (EPAC)-dependent signalling mechanism.

136 **How might this impact on clinical practice in the foreseeable future?**

- 137 • The ability of incretins to bypass defects in mitochondrial function might be  
138 exploited by the design of new agonists which target this pathway.

## 139 **Introduction**

140 Mitochondria are often referred to as the powerhouses or “chief executive organelles”  
141 of the cell, using fuels to provide most of the energy required to sustain normal function  
142 [3]. Mitochondrial oxidative metabolism plays a pivotal role in the response of  
143 pancreatic beta cells to stimulation by glucose and other nutrients [4]. Thus, as blood  
144 glucose increases, enhanced glycolytic flux and oxidative metabolism lead to an  
145 increase in ATP synthesis, initiating a cascade of events which involve the closure of  
146 ATP-sensitive  $K^+$  ( $K_{ATP}$ ) channels [5], plasma membrane depolarisation and the influx  
147 of  $Ca^{2+}$  via voltage-dependent  $Ca^{2+}$  channels (VDCC). The latter, along with other,  
148 less well defined “amplifying” signals [6], drive the biphasic release of insulin [4]. Gut-  
149 derived incretin hormones including glucagon-like peptide-1 (GLP-1) and glucose-  
150 dependent insulintropic peptide (GIP) [7] further potentiate secretion by binding to  
151 class-B G-protein coupled receptors (GPCRs) to generate cAMP and other  
152 intracellular signals [8].

153

154 Changes in mitochondrial function in beta cells may also contribute to declining insulin  
155 secretion and to T2D [9] and has been described in several models of the disease  
156 [10]. Additionally, variants in mitochondrial DNA (mtDNA) in human populations are  
157 associated with altered T2D risk [11]. In animal models, alterations in beta cell mtDNA  
158 lead to reduced GSIS, hyperglycaemia and beta cell death [12].

159 Under normal physiological conditions, mitochondria undergo fusion and fission cycles  
160 which are essential for quality control and adaptation to energetic demands [13]. Thus,  
161 highly inter-connected mitochondrial networks allow communication and interchange  
162 of contents between mitochondrial compartments, as well as with other organelles

163 such as the endoplasmic reticulum (ER) [14]. These networks exist interchangeably  
164 with more fragmented structures, displaying more “classical” mitochondrial  
165 morphology [15]. Mitochondrial fission is necessary for “quality control” and the  
166 elimination of damaged mitochondria by mitophagy [16].

167 Whilst the mitofusins MFN1 and MFN2, homologues of the *D. melanogaster* fuzzy  
168 onions (*fzo*) and mitofusin (*dmfn*) gene products [17], are GTPases that mediate fusion  
169 of the outer mitochondrial membrane (OMM), optic atrophy protein 1 (OPA1) controls  
170 that of the inner mitochondrial membrane (IMM). Dynamin related protein 1 (DRP1) is  
171 responsible for mitochondrial fission [18]. Other regulators include FIS1, mitochondrial  
172 fission factor (MFF) and MiD49/51 [19].

173 Changes in mitochondrial fusion and fission dynamics are observed in the pancreatic  
174 beta cell in animal models of diabetes [9, 20], and patients with T2D and obesity exhibit  
175 smaller and swollen mitochondria in pancreatic tissue samples [1]. Additionally, toxic  
176 islet amyloid polypeptide (IAPP) oligomers, usually co-expressed with insulin in beta  
177 cells, were present in both ER and mitochondrial membranes of T2D patients and  
178 rodents transgenic for human-IAPP (h-IAPP) [21].

179 Here, we explore the potential impact of mitochondrial fragmentation in the control of  
180 insulin secretion. We show that this manoeuvre exerts profound effects on insulin  
181 release, glucose homeostasis and  $\text{Ca}^{2+}$  dynamics. Remarkably, the deficiencies in  
182 insulin secretion are largely corrected by incretin hormones, suggesting a possible  
183 approach to ameliorating the consequences of mitochondrial fragmentation in some  
184 forms of diabetes.

185

186

187 **Methods**

188 **Study approval** C57BL/6J mice were housed in individually ventilated cages in a  
189 pathogen-free facility at 22°C with a 10-14 h light-dark cycle and were fed *ad libitum*  
190 with a standard mouse chow diet (Research Diets, New Brunswick, NJ, USA). All *in*  
191 *vivo* procedures were approved by the UK Home Office, according to the Animals  
192 (Scientific Procedures) Act 1986 with local ethical committee approval under personal  
193 project license (PPL) number PA03F7F07 to I.L.

194

195 **Generation of beta cell selective *Mfn1/Mfn2* knockout ( $\beta$ *Mfn1/2* dKO), *Clec16a***  
196 **null and *Pdx1CreER* mice** Animals were purchased and genotyped as described in  
197 ESM Methods.

198

199 **mRNA extraction and quantitative reverse transcription PCR** For measurements  
200 of mRNA levels, pancreatic islets from control and  $\beta$ *Mfn1/2* dKO mice were isolated  
201 by collagenase digestion [22]. Total RNA from islets (50-100) was extracted and  
202 reverse transcribed as previously described [23] (see ESM Table 2 for primer details).

203

204 **Tissue DNA extraction and measurement of mitochondrial DNA (mtDNA) copy**  
205 **number** Total islet DNA was isolated using Puregene Cell and Tissue Kit (Qiagen,  
206 Manchester, UK). See ESM Methods for further details.

207

208 **SDS-PAGE and western blotting** Islets were collected and lysed (20  $\mu$ g) as  
209 previously described [23]. See ESM Methods for details.

210



211 **Intraperitoneal (i.p.) or oral gavage of glucose followed by insulin or ketone**  
212 **levels measurement and insulin tolerance assessment *in vivo*** IPGTTs, IPIITTs,  
213 OGTTs and plasma insulin measurements were performed as previously described  
214 [23] in control and  $\beta Mfn1/2$  dKO mice.  $\beta$ -ketones were measured in tail vein blood from  
215 fed or fasted (16h) mice using an Area 2K device (GlucoMen, Berkshire, UK).

216

217 ***In vitro* insulin secretion** Isolated islets were subjected to glucose-stimulated insulin  
218 secretion as described in ESM Methods.

219

220 **cAMP assay** Total cAMP was measured in primary dispersed mouse islet cells as  
221 described in ESM Methods.

222

223 **Single-cell fluorescence imaging** Pancreatic islets were isolated from mice,  
224 dissociated into single beta cells and plated onto glass coverslips [24]. See ESM  
225 Methods for details.

226

227 **Mitochondrial shape analysis** To determine morphological characteristics of  
228 mitochondria, confocal stacks were analysed with ImageJ using an in-house macro  
229 (available upon request). See ESM Methods for details.

230

231 **Whole-islet fluorescence imaging** Fluorescence imaging of whole islets was  
232 performed as described in ESM Methods.

233

234 **TIRF fluorescence imaging** Experiments using the membrane-located zinc sensor  
235 ZIMIR [25] or the genetically-encoded and vesicle-located green marker NPY-Venus  
236 were performed as presented in ESM Methods.

237

238 **Pancreas immunohistochemistry** Isolated pancreata were fixed and visualised as  
239 described in ESM Methods.

240

241 **Metabolomics/lipidomics** Plasma samples from control and dKO mice were  
242 analysed as described in ESM Methods.

243

244 **Measurement of oxygen consumption rate** Seahorse XF96 extracellular flux  
245 analyzer (Seahorse Bioscience, Agilent, Santa Clara, CA, USA) was used for intact  
246 mouse islets respirometry as described in ESM Methods.

247

248 **Electron microscopy (EM) Fixed** islets were processed as described in ESM  
249 Methods.

250

251 ***In vivo* Ca<sup>2+</sup> imaging of AAV8-INS-GCaMP6s infected endogenous pancreatic**  
252 **islets** Pancreatic islets of control and  $\beta$ *Mfn1/2*-KO mice were imaged *in vivo* as  
253 described in ESM Methods.

254

255 **Connectivity analysis**

256 **Pearson (*r*)-based connectivity and correlation analyses** Correlation analyses  
257 were performed as described in ESM Methods.

258

259 **Monte Carlo-based signal binarisation and data shuffling for identification of**

260 **highly connected cells** Data were analysed using approaches as previously

261 described [26, 27]. For further details see ESM Methods.

262

263 **RNA-Seq data analysis** Processing and differential expression analysis of RNA-Seq

264 data was performed as in [28] and ESM Methods.

265

266 **Statistics** Data are expressed as mean  $\pm$  SEM unless otherwise stated. Significance

267 was tested by Student's two-tailed t-test and Mann–Whitney correction or two-way

268 ANOVA with Sidak's multiple comparison test for comparison of more than two groups,

269 using GraphPad Prism 8 software (San Diego, CA, USA).  $p < 0.05$  was considered

270 significant. Experiments were not randomised or blinded.

## 271 Results

272 **Generation of a conditional  $\beta Mfn1/2$  dKO mouse line.** Efficient deletion of *Mfn1*  
273 and *Mfn2* in the beta cell was achieved in adult mice using the Pdx1-Cre<sup>ERT2</sup> transgene  
274 and tamoxifen injection at 7-8 weeks. Possession of this transgene alone had no effect  
275 on glycaemic phenotype or cellular composition of pancreatic islets (Suppl. Fig. **1A-C**).  
276 Deletion of mitofusin genes was confirmed by qRT-PCR (Fig. **1A**) and Western  
277 (immuno-) blotting (Fig. **1B**) analysis in 14-weeks old male mice. Relative to  $\beta$ -actin,  
278 expression of the *Mfn1* and *Mfn2* transcripts in isolated islets from dKO mice  
279 decreased by ~83 and 86% accordingly vs control islets (Fig. **1A**;  $p < 0.01$ ,  $p < 0.0001$ ),  
280 consistent with selective deletion in the beta cell compartment [29]. No differences  
281 were detected in the expression of other mitochondrial fission and fusion mediator  
282 genes such as *Opa1*, *Drp1* and *Fis1* (Fig. **1A**). Body weights also differed between  
283 groups after 20-21 weeks (Suppl. Fig. **2A**;  $p < 0.05$ ).

284  
285  **$\beta Mfn1/2$  dKO mice are glucose intolerant with impaired GSIS *in vivo*.** To study  
286 the effects of mitofusin gene deletion in beta cells on systemic glucose homeostasis  
287 and insulin secretion *in vivo*, i.p. injections (IPGTT) were performed on  $\beta Mfn1/2$  dKO  
288 and control mice (Fig. **1C**). Glucose challenge revealed impaired glucose tolerance in  
289 dKO mice compared to their control littermates with levels of glucose being higher at  
290 most time points following glucose injection (Fig. **1C-D**;  $p < 0.05$ ,  $p < 0.001$ ). Glucose  
291 intolerance was even more prominent in 20-weeks old dKO mice (Suppl. Fig. **2B-C**;  
292  $p < 0.001$ ,  $p < 0.0001$ ).  $\beta Mfn1/2$  dKO mice (with a 27 mmol/l glycaemia at 15 min.;  
293 Fig. **1E-F**;  $p < 0.05$ ;  $p < 0.01$ ;  $p < 0.001$ ) showed dramatically lower insulin levels upon  
294 glucose challenge vs control animals, indicating a severe insulin secretory deficiency  
295 (Fig. **1G-H**,  $p < 0.01$ ,  $p < 0.001$ ,  $p < 0.0001$ ). In contrast, following an oral gavage (Fig. **1I-J**),

296 the plasma insulin levels in dKO mice (with a 27 mmol/l glycaemia at 15min.) were  
297 indistinguishable from control animals (Fig.1K-L;p<0.05; 0 vs 15min. in dKO). Insulin  
298 tolerance was unaltered insulin tolerance in  $\beta Mfn1/2$  dKO mice vs control littermates  
299 (Suppl.Fig.1D-E). Nevertheless, dKO mice displayed significantly elevated plasma  
300 glucose (Suppl.Fig.1F) under both fed and fasted conditions. Additionally, an increase  
301 in  $\beta$ -ketones (ketone bodies) was observed in fasted dKO vs control mice  
302 (Suppl.Fig.1G). These changes were inversely related to plasma insulin levels, which  
303 were lower in dKO than control mice under both fed and fasted, conditions  
304 (Suppl.Fig.1H).

305

306 **Deletion of *Mfn1/2* alters mitochondrial morphology in beta cells.** Mitochondrial  
307 morphology was assessed using confocal imaging and digital deconvolution.  
308 Mitochondria were elongated in dissociated control beta cells (Fig.2A) while the  
309 mitochondrial network in dKO cells was highly fragmented (Fig.2A; and inset). The  
310 number of mitochondria per cell was not altered (Fig.2B). Mitochondrial elongation and  
311 perimeter were significantly decreased in  $\beta Mfn1/2$  dKO cells, while circularity on the  
312 other hand, was increased indicative of rounder and smaller organelles (Fig.2B;  
313 p<0.0001). Mitochondrial structure was also evaluated in isolated islets by  
314 transmission electron microscopy (TEM), confirming the presence of more highly  
315 fragmented mitochondria in dKO mouse islets compared to the control group (Fig.2C).  
316 Cristae structure and organisation were also markedly altered in  $\beta Mfn1/2$  dKO islet  
317 cells (Fig.2C;enlarged panels and schematic representations).

318

319 ***Mitofusin* deletion leads to modest changes in beta cell mass.**

320 Immunohistochemical analysis of pancreata from dKO mice showed a small but

321 significant (~33%) loss of pancreatic beta (insulin-positive) cells vs the control group  
322 (Fig.3A-B;  $p < 0.05$ ). Alpha (glucagon-positive) cell surface was not affected by the loss  
323 of mitofusin genes (Fig.3C). However, *Mfn1* and *Mfn2* loss was associated with a  
324 ~53% reduction in beta cell-alpha cell ratio (Fig.3D;  $p < 0.05$ ). In line with these findings,  
325 the number of TUNEL-positive beta cells were markedly increased in dKO vs control  
326 animals (Fig.3E-F;  $p < 0.05$ ), suggesting that programmed cell death contributes to the  
327 observed decrease in beta cell mass.

328

329 **Beta cell identity is modestly altered in  $\beta$ Mfn1/2 dKO islets.** Whilst *Ins2*, *Ucn3* and  
330 *Glut2* (*Slc2a2*) were significantly downregulated, *Trpm5* was upregulated, in dKO  
331 islets (Suppl.Fig.3). No changes in  $\alpha$ - or beta cell disallowed genes [30] were detected.  
332 In contrast, genes involved in mitochondrial function such as *Smdt1* and *Vdac3* were  
333 upregulated in  $\beta$ Mfn1/2 dKO islets, consistent with compromised mitochondrial  $\text{Ca}^{2+}$   
334 uptake, and ATP production, respectively, in dKO beta cells (Suppl.Fig.3). Lastly,  
335 genes involved in ER stress and mito/autophagy were also affected by inactivation of  
336 *Mfn1* and *Mfn2* with *Chop* (*Ddit3*) and *p62* being upregulated and *Lc3* and *Cathepsin*  
337 *L* downregulated.

338

339 **Glucose-induced cytosolic  $\text{Ca}^{2+}$  and  $\Delta\psi_m$  changes are impaired in  $\beta$ Mfn1/2 dKO**  
340 **beta cells *in vivo*.** Mitochondrial membrane polarisation ( $\Delta\psi_m$ ) and  $\text{Ca}^{2+}$  dynamics  
341 were next studied *in vivo*. Animals previously infected with GCaMP6s, and co-stained  
342 with tetramethyl rhodamine methyl ester (TMRM) immediately prior to data capture,  
343 were imaged for 18-30 min. post i.p. injection of glucose in control (Fig.4A;  
344 Suppl.Fig.4A) and dKO mice (Fig.4B; Suppl.Fig.4B). Imaging revealed cytosolic  $\text{Ca}^{2+}$   
345 oscillations ( $[\text{Ca}^{2+}]_{\text{cyt}}$ ; upward traces) and synchronous mitochondrial membrane

346 depolarisation (downward traces; TMRM positive organelles) in response to elevated  
347 glucose in control beta cells. These were largely abolished in dKO islets in response  
348 to glucose (Fig.4B;Suppl.Fig.4B). Measurement of the AUC of fold change traces  
349 above baseline depicted significantly impaired GCaMP6s spike signals in response to  
350 glucose (Fig.4C;p<0.001 and p<0.05; Suppl.Fig.4C) and a tendency towards less  
351 TMRM uptake in dKO islets (Fig.4D).

352

353 **Mitofusins are essential to maintain normal glucose-stimulated Ca<sup>2+</sup> dynamics,**  
354 **mitochondrial membrane potential and ATP synthesis in beta cells.** Increased  
355 cytosolic Ca<sup>2+</sup> is a major trigger of insulin exocytosis in response to high glucose [4].  
356 dKO mouse islets exhibited a significantly lower increase in [Ca<sup>2+</sup>]<sub>cyt</sub> compared to  
357 control islets (Fig.5A-C;p<0.01). When the K<sub>ATP</sub> channel opener diazoxide and a  
358 depolarising K<sup>+</sup> concentration (20 mmol/l KCl) were then deployed together to bypass  
359 the regulation of these channels by glucose, cytosolic Ca<sup>2+</sup> increases were not  
360 significantly impaired in dKO compared to control animals (Fig.5B-C). A substantial  
361 reduction in mitochondrial free Ca<sup>2+</sup> concentration ([Ca<sup>2+</sup>]<sub>mito</sub>) in response to 17 mmol/l  
362 glucose [23, 31] was also observed in dKO islets (Fig.5D-F; p<0.05). Of note,  
363 subsequent hyperpolarisation of the plasma membrane with diazoxide caused the  
364 expected lowering of mitochondrial [Ca<sup>2+</sup>]<sub>mito</sub> in control islets (reflecting the decrease  
365 in [Ca<sup>2+</sup>]<sub>cyt</sub>;Fig.5E-F), but was almost without effect on dKO islets.

366

367 Glucose-induced increases in Δψ<sub>m</sub> were also sharply reduced in dKO vs control  
368 mouse islets (Fig.5G-H; p<0.01). Addition of 2-[2-[4-  
369 (trifluoromethoxy)phenyl]hydrazinylidene]-propanedinitrile (FCCP) resulted in a  
370 similar collapse in apparent Δψ<sub>m</sub> in islets from both genotypes (Fig.5G). To assess

371 whether mitochondrial fragmentation may impact glucose-induced increases in  
372 mitochondrial ATP synthesis we performed real-time fluorescence imaging using  
373 Perceval (Fig.5I-J). While control islets responded with a time-dependent rise in the  
374 ATP:ADP ratio in response to a step increase in glucose from 3 mmol/l to 17 mmol/l,  
375  $\beta Mfn1/2$  dKO beta cells failed to mount any response (Fig.5J;p< 0.05).

376

377 **Beta cell-beta cell connectivity is impaired by *Mfn1/2* ablation.** Intercellular  
378 connectivity is required in the islet for a full insulin secretory response to glucose [10,  
379 26]. To assess this, individual  $Ca^{2+}$  traces recorded from Cal-520-loaded beta-cells in  
380 mouse islets (Fig.5A-B) were subjected to correlation (Pearson  $r$ ) analysis to map cell-  
381 cell connectivity (Suppl.Fig.5A). Following perfusion at 17 mmol/l glucose,  $\beta Mfn1/2$   
382 dKO beta cells tended to display an inferior, though not significantly different,  
383 coordinated activity than control cells, as assessed by counting the number of  
384 coordinated cell pairs (Suppl.Fig.5C; 0.94 vs 0.90 for control vs dKO, respectively). By  
385 contrast, beta cells displayed highly coordinated  $Ca^{2+}$  responses upon addition of 20  
386 mmol/l KCl in dKO islets. Similarly, analysis of correlation strength in the same islets  
387 revealed significant differences in response to 17 mmol/l glucose between genotypes.  
388 In fact, dKO islets had weaker mean beta-beta cell coordinated activity (Suppl. Fig.5B,  
389 D; p<0.05; 0.88 vs 0.77 for control vs dKO, respectively), indicating that mitofusins  
390 affect the strength of connection rather than the number of coordinated beta cell pairs.  
391 A tending towards lower expression of the gap junction gene *Cx36/Gjd2* has also been  
392 observed in dKO islets (Suppl.Fig.5E).

393

394 Clear adherence to a power law distribution of connected beta cells [26, 27] was  
395 apparent in the control islet group in the elevated glucose condition where 5.70% of



396 the beta cells hosted at least 60% of the connections with the rest of the beta cells  
397 ('hubs';Suppl.Fig.6;  $R^2=0.15$ ). No clear adherence to a power-law distribution of  
398 connected beta cells was present in the dKO group ( $R^2=0.002$ ) despite displaying a  
399 higher percentage (15.06%) of beta cell-beta cell connections.

400

401 **Unaltered ER  $Ca^{2+}$  mobilisation but decreased mitochondrial  $O_2$  consumption**  
402 **and mtDNA depletion in  $\beta Mfn1/2$  dKO islets.** No differences in cytosolic  $Ca^{2+}$   
403 responses between genotypes were observed after agonism at the Gq-coupled  
404 metabotropic acetylcholine (ACh) receptor (Fig.6A-C). In contrast, measurements of  
405  $O_2$  consumption revealed that both basal and glucose-stimulated mitochondrial  
406 respiratory capacities were significantly impaired in dKO islets (Fig.6D-E). Moreover,  
407 dKO islets displayed a ~75% reduction in mtDNA (Fig.6F; $p<0.05$ ).

408

409 **Impaired GSIS *in vitro* and beta cell connectivity can be rescued by incretins in**  
410  **$\beta Mfn1/2$  dKO mouse islets.** While GSIS was markedly impaired in dKO islets  
411 (Fig.7A; $p<0.05$ ), incretins (GLP-1 or GIP), or the GLP1R agonist exendin-4, at a  
412 submaximal concentration of 10 mmol/l glucose, led to a significant potentiation in  
413 GSIS in both groups (control: 3G vs ex4;  $p<0.05$  and dKO: 3G vs ex4;  $p<0.0001$ , or  
414 3G vs GLP-1;  $p<0.001$ , or 3G vs GIP;  $p<0.001$ ). Consequently, insulin secretion in  
415 response to 10 mmol/l glucose was no longer different between control and  $\beta Mfn1/2$   
416 dKO islets after incretin addition (Fig.7A-B). Moreover, under these conditions, forced  
417 increases in intracellular cAMP imposed by the addition of FSK or IBMX, which  
418 activate adenylate cyclase (AC) and inhibit phosphodiesterase (PDE) respectively,  
419 also eliminated differences in GSIS between the genotypes (Fig.7B). No differences

420 in insulin secretion were observed between control and dKO islets after depolarisation  
421 with KCl.

422

423 We next explored whether the incretin-mediated improvements in insulin secretion in  
424 response to incretins were the result of altered  $[Ca^{2+}]_{cyt}$  dynamics. Islets from isolated  
425 dKO mice displayed a delayed increase in  $[Ca^{2+}]_{cyt}$  in response to 10 mmol/l glucose  
426 compared to control islets (Fig.7C-D;  $p=0.09$ ; AUC control: 10G vs ex4;  $p<0.05$ ; dKO:  
427 10G vs ex4;  $p<0.001$ ; ex4 vs KCl;  $p<0.05$ ). Addition of exendin-4 led to the emergence  
428 of oscillatory activity in both groups and under these conditions, differences between  
429 genotypes, as seen in Fig.5B, were no longer evident (Fig.7C). Measured at 10mmol/l  
430 glucose, control and dKO islets displayed increases in ER  $Ca^{2+}$  in response to  
431 exendin-4 (Fig.7E-F; AUC; $p<0.001$ ) while the response exaggerated in the latter  
432 group. Neither group displayed significant changes in ATP:ADP ratio in response to  
433 exendin-4 (Fig.7G-H;AUC; $p<0.01$ ). Analysis of OCR revealed no significant  
434 differences between genotypes at 10mmol/l glucose in the presence or absence of  
435 exendin-4 or FSK (Fig.7I;  $p<0.05$ ). Finally, exendin-4 sharply increased beta cell-beta  
436 cell connectivity in dKO, but not in control islets, as assessed by monitoring  $Ca^{2+}$   
437 dynamics and the number of correlated cell pairs (Fig. 8A,C) or Pearson  $r$  value (Fig.  
438 8B,D).

439

#### 440 **Insulin secretion is rescued by incretins through an EPAC-dependent activation.**

441 Neither basal nor incretin-stimulated cAMP levels differed between control and dKO  
442 groups (Fig.9A). Nonetheless, insulin secretion was amplified in the presence of the  
443 protein kinase A (PKA) inhibitor H89 alone or in addition to IBMX and FSK in dKO  
444 islets (Fig.9B;  $p<0.05$ ,  $p<0.01$ ,  $p<0.001$ ). Insulin secretion was further increased in

445 dKO islets when EPAC was selectively activated, while PKA was inhibited by H89  
446 (Fig.9C;  $p < 0.05$ ).

447

448 **Defective glucose-stimulated insulin secretion is rescued by GLP-1R agonism**

449 **in *Clec16a* null mice.** To determine whether incretins may reverse defective insulin

450 secretion in an alternative model of mitochondrial dysfunction, we examined mice

451 lacking the mitophagy regulator *Clec16a* selectively in the pancreatic islet

452 (*Clec16a*<sup>Δpanc</sup>) [32]. Glucose-stimulated insulin secretion was sharply inhibited in null

453 vs Pdx1-Cre control mice, and these differences between genotype were largely

454 corrected in by the addition of exendin-4 (Suppl. Fig.7A;  $p < 0.0001$ ). Correspondingly,

455 whereas the difference between *Clec16a*<sup>Δpanc</sup> and control mice was significant for

456 IPGTTs there was no such (significant) difference for the OGTTs at 15mins, in line

457 with the findings above for  $\beta$ *Mfn1/2* dKO mice (Suppl. Fig.7B-C;  $p < 0.05$ ,  $p < 0.01$ ).

458

459 **Defective secretion of a preserved pool of morphologically-docked granules in**

460  **$\beta$ *Mfn1/2* dKO mouse beta cells.** To determine whether the markedly weaker

461 stimulation of insulin secretion in dKO islets may reflect failed recruitment of secretory

462 granules into a readily releasable or morphologically-docked pool beneath the plasma

463 membrane, we next deployed total internal reflection fluorescence (TIRF) microscopy

464 in dissociated beta cells. By over-expressing the secretory vesicle marker

465 neuropeptide Y-Venus (NPY-Venus), the number of insulin granules was significantly

466 higher in close proximity with the plasma membrane in dKO cells after treatment with

467 20 mmol/l KCl (Suppl.Fig.8A-B;  $p < 0.05$ ). However, when we then used the cell

468 surface-targeted Zinc indicator to monitor induced exocytotic release (ZIMIR) [25] in

469 response to depolarisation as a surrogate for insulin secretion, release events were  
470 fewer in number and smaller in dKO (Suppl.Fig.8C-E).

471 **Altered plasma metabolomic and lipidomic profiles in  $\beta$ Mfn1/2 dKO mice.** We  
472 applied an -omics approach to study metabolite and lipid changes in peripheral plasma  
473 samples from control and dKO mice (Suppl.Fig.9). Of 29 metabolites, the levels of five  
474 metabolic species (shown in red) were significantly altered in  $\beta$ Mfn1/2 dKO compared  
475 to control animals (Suppl.Fig.9A;  $p < 0.05$ ;  $p < 0.01$ ). In the lipidomics analysis, 298 lipid  
476 species from 17 different classes were studied. When comparing dKO to control  
477 samples, the majority of lipid classes displayed a remarkably homogeneous downward  
478 trend of the individual lipid species they comprised (Suppl.Fig.9B;  $p < 0.05$ ;  $p < 0.01$ ).

479 **Changes in *Mfn1* and *Mfn2* expression in mouse strains maintained on regular**  
480 **chow or high fat high sugar (HFHS) diet.** To determine whether the expression of  
481 *Mfn1* or *Mfn2* might be affected under conditions of hyperglycaemia mimicking T2D in  
482 humans, we interrogated data from a previous report [33] in which RNA sequencing  
483 was performed on six mouse strains. BALB/cJ mice showed “antiparallel” changes in  
484 *Mfn1* and *Mfn2* expression in response to maintenance on high fat high sugar (HFHS)  
485 diet for 10 days, and similar changes were obtained in DBA/2J mice at 30 and 90 days  
486 (Suppl.Fig.10A-B).

## 487 **Discussion**

488 The key goal of the present study was to determine the impact of disrupting  
489 mitochondrial dynamics on glucose- and incretin-stimulated insulin secretion. Deletion  
490 of both mitofusin isoforms selectively from the adult beta cell led to fragmentation of  
491 the mitochondrial network, impaired glucose signalling and altered beta cell identity.  
492 These changes were associated with marked dysglycaemia, which worsened with  
493 age. We chose the above strategy over the deletion of either mitofusin gene alone  
494 given the similar levels of expression of both in the beta cell [34] and the likelihood of  
495 at least partial functional redundancy as reported in [35]. Specifically, this recent report  
496 [35], using a complementary strategy (deletion with the constitutive *Ins1Cre* deleter  
497 strain), supports this view, demonstrating minor phenotypic effects of deletion in the  
498 beta cell of *Mfn1* or *Mfn2* alone.

499

500 The present study shows for the first time that collapse of the mitochondrial network  
501 prompted by the loss of *Mfn1* and *Mfn2* has a drastic impact on beta cell function. Our  
502 findings are in line with earlier studies which provided evidence for a critical role for  
503 preserved mitochondrial dynamics in insulin secretion [36, 37]. In these earlier studies,  
504 deletion of *Drp1* from primary mouse beta cells resulted in glucose intolerance,  
505 impaired GSIS and abnormal mitochondrial morphology. Conversely, over-expression  
506 of DRP1 in clonal INS1 cells decreased GSIS and increased the levels of apoptosis  
507 [38], suggesting that a balance between fission and fusion is critical to avoid  
508 pathological changes. Finally, mice deficient for *Opa1* in the beta cell develop  
509 hyperglycaemia, and show defects in the electron transport chain complex IV, Ca<sup>2+</sup>  
510 dynamics, and insulin secretion [2]. None of the above studies explored the effects on  
511 incretin-stimulated secretion.

512 A striking finding in the present report is that, in contrast to results during  
513 intraperitoneal glucose injection, insulin secretion and glucose excursion were largely  
514 normal in dKO mice during OGTTs, where an incretin effect is preserved [7]. Incretins  
515 act, at least in large part, by increasing intracellular cAMP, and adequate cAMP levels  
516 are required for the normal stimulation of insulin secretion as glucose concentrations  
517 rise [7]. Conversely, incretin action requires adequate glucose levels (and hence  
518 intracellular metabolism of the sugar) [7]. Others [39, 40] have previously suggested  
519 that cAMP-raising agents may rescue the metabolic signalling defects associated with  
520 T2D. However, we are not aware of any previous studies which have *selectively*  
521 interfered with mitochondrial function, and then explored the ability of incretins to  
522 induce a reversal of the secretory deficiency.

523

524 What mechanisms might explain the ability of incretins to bypass defective insulin  
525 secretion after disruption of mitochondrial networks? Explored in dissociated islets,  
526 cAMP levels were not different between control and dKO animals in the absence or  
527 presence of hormones or GLP1R agonists. cAMP acts at multiple points in the  
528 secretory pathway, regulating plasma membrane excitability and  $Ca^{2+}$  dynamics  
529 (partly via exchange protein activated by cAMP and mainly EPAC2 translocation to  
530 granule docking sites on the plasma membrane) [40-42] and also on the exocytotic  
531 machinery via N-ethylmaleimide-sensitive attachment receptor (SNARE) proteins [43].  
532 Here we show that insulin secretion stimulated by incretins is potentiated in dKO cells  
533 through an EPAC-dependent activation, while PKA has an inhibitory effect on  
534 secretion. It is still unknown how fragmented mitochondria are associated with the  
535 positive regulation of insulin secretion by EPAC and more studies need to be  
536 undertaken to explore this phenomenon. Synaptotagmin-7, another critical regulator

537 of  $\text{Ca}^{2+}$ -mediated exocytosis in beta cells, is known to be phosphorylated and activated  
538 by PKA [40], and may thus represent a potential target for incretin action in dKO cells.  
539 No difference in mobilization of  $\text{Ca}^{2+}$  was observed between groups using the IP3R  
540 agonist Ach, implying that ER  $\text{Ca}^{2+}$  stores are not depleted. Nevertheless, by mitofusin  
541 deletion, perfusion of exendin-4 revealed that  $\text{Ca}^{2+}$  accumulation in the ER was higher  
542 in dKO cells. This could be associated with a rapid mobilisation and increase in  
543  $[\text{Ca}^{2+}]_{\text{cyt}}$  oscillatory response that lead to an enriched pulsatile insulin secretion and  
544 beta cell connectivity [44]. Moreover, since  $[\text{Ca}^{2+}]_{\text{m}}$  uptake was impaired in dKO cells  
545 and maintaining a high  $[\text{Ca}^{2+}]_{\text{ER}}$  is important for beta cell function and survival, the ER  
546 could work as a rescue machinery to avoid  $[\text{Ca}^{2+}]_{\text{cyt}}$  overload and toxicity or  
547 inflammatory stress [44].

548

549 Of note, impaired glucose-induced ATP synthesis and  $\text{O}_2$  consumption seen in  
550 fragmented dKO mitochondria were not recovered by incretins (at least under  
551 10mmol/l glucose). This suggests that the acute rescue of insulin secretion is, to a  
552 substantial extent, independent of (and thus downstream to) changes in mitochondrial  
553 oxidative metabolism, in line with reports [45] that  $\text{O}_2$  consumption is only weakly  
554 affected by incretins in wild-type islets.

555

556 Importantly, we demonstrate that preserved mitochondrial ultra-structure is critical for  
557 normal beta cell-beta cell connectivity [27]. The mechanisms underlying these  
558 changes are, however, unclear but could be associated with altered *Cx36/Gjd2*  
559 expression, phosphorylation or activity, and hence the formation of gap junctions  
560 between beta cells [46]. Of note, highly connected “hub” [26] and leader [27] beta cell  
561 populations have been proposed to be particularly reliant on mitochondrial function

562 [27]. Nevertheless, we did not observe any loss of hierarchical behaviour or apparent  
563 hub cell number in dKO mice.

564

565 Metabolomic analyses revealed that the dKO mouse provides a useful model of  
566 defective beta cell function observed, to differing extents, in both type 1 and type 2  
567 diabetes [47-49].

568

569 Might changes in *Mfn1* and *Mfn2* expression be involved in diabetes development in  
570 rodents or humans? Changes in the expression of both genes were observed in two  
571 mouse models of the disease, in line with previous findings in beta cells  
572 overexpressing h-IAPP [21]. However, we are not aware of studies reporting changes  
573 in the expression of human *MFN1* or *MFN2* in human beta cells in this setting.

574

575 Our findings show that acute treatment with incretins, commonly used as treatments  
576 for T2D and obesity [7], largely reverses the deficiencies in insulin secretion and  
577 cytosolic Ca<sup>2+</sup> signalling. We also demonstrate that highly selective impairments of  
578 mitochondrial function in beta cells can be rescued or bypassed by incretin treatment,  
579 and suggest that this might be an important mechanism of action for this drug class.



580 **Acknowledgements**

581 We thank Stephen M. Rothery from the Facility for Imaging by Light Microscopy (FILM)  
582 at Imperial College London for support with confocal and widefield microscopy image  
583 recording and analysis. We also thank Aida Di Gregorio from the National Heart and  
584 Lung Institute (Imperial College) for genotyping the mice.

585

586 **Data Availability.**

587 Not applicable.

588

589 **Funding**

590 GAR was supported by a Wellcome Trust Senior Investigator Award (098424AIA) and  
591 Investigator Award (212625/Z/18/Z), MRC Programme grants (MR/R022259/1,  
592 MR/J0003042/1, MR/L020149/1), an Experimental Challenge Grant (DIVA,  
593 MR/L02036X/1), an MRC grant (MR/N00275X/1), and a Diabetes UK grant  
594 (BDA/11/0004210, BDA/15/0005275, BDA16/0005485). IL was supported by a  
595 Diabetes UK project grant (16/0005485). This project has received funding from the  
596 Innovative Medicines Initiative 2 Joint Undertaking, under grant agreement no. 115881  
597 (RHAPSODY). This Joint Undertaking receives support from the European Union's  
598 Horizon 2020 research and innovation programme and EFPIA. This work is supported  
599 by the Swiss State Secretariat for Education, Research and Innovation (SERI), under  
600 contract no. 16.0097. AT was supported by MRC project grant MR/R010676/1.  
601 Intravital imaging was performed using resources and/or funding provided by National  
602 Institutes of Health grants R03 DK115990 (to AKL), Human Islet Research Network  
603 UC4 DK104162 (to AKL; RRID:SCR\_014393). BJ acknowledges support from the  
604 Academy of Medical Sciences, Society for Endocrinology, The British Society for

605 Neuroendocrinology, the European Federation for the Study of Diabetes, an EPSRC  
606 capital award and the MRC (MR/R010676/1). SAS was supported by the JDRF (CDA-  
607 2016-189, SRA-2018-539, COE-2019-861), the NIH (R01 DK108921, U01  
608 DK127747), and the US Department of Veterans Affairs (I01 BX004444).

609

## 610 **Author contributions**

611 EG performed experiments and analysed data. EG supported the completion of  
612 confocal and widefield microscopy and analysis. ATC performed the EM sample  
613 processing and data analysis. CM, MM and AKL were responsible for the *in vivo*  
614 intravital Ca<sup>2+</sup> imaging in mice. PC contributed to the analysis and manipulation of the  
615 *in vivo* intravital Ca<sup>2+</sup> measurements as well as the preparation and imaging of TIRF  
616 samples. TS contributed to the generation of the MATLAB script used for connectivity  
617 analysis. FYSW and YA generated and performed Monte Carlo-based signal  
618 binarisation. BJ performed the cAMP assays. EA and LLN performed the oral gavage  
619 in live animals. YX and GG performed studies with Pdx1CreER mice. NA assisted with  
620 Seahorse experiment protocols. CLQ and AW contributed to the metabolomics  
621 analysis. CCG, CM and MI were responsible for the RNAseq data analysis. SAS  
622 performed studies with Clec16a mice. TAR was involved in the design of the floxed  
623 *Mfn* alleles. TAR and IL were responsible for the maintenance of mouse colonies and  
624 final approval of the version to be published. GAR designed the study and wrote the  
625 manuscript with EG with input and final approval of the version to be published from  
626 all authors. GAR is the guarantor of this work and, as such, had full access to all the  
627 data in the study and takes responsibility for the integrity of the data and the accuracy  
628 of the data analysis.

629

630 **Declaration of interests**

631 Authors' relationships and activities GAR has received grant funding and consultancy  
632 fees from Les Laboratoires Servier and Sun Pharmaceuticals. The remaining authors  
633 declare that there are no relationships or activities that might bias, or be perceived to  
634 bias, their work.

635

636 **Electronic Supplemental Information**

637 Supplemental Figures (1-10)

638 Supplemental Figure legends

639 **Electronic Supplemental Tables**

640 **ESM Table 1.** Sequence of primers used for genotyping *Mfn1* and *Mfn2* flox.

641 **ESM Table 2.** List of primers used for qRT-PCR.

642 **ESM Table 3.** Metabolite differences found in plasma samples of control vs dKO mice  
643 according to metabolic class and both fold-change and t-test criteria.

644 **ESM videos 1- 6**

## 645 **References**

- 646 1. Masini, M., Et Al., Ultrastructural Alterations Of Pancreatic Beta Cells In Human  
647 Diabetes Mellitus. *Diabetes/Metabolism Research And Reviews*, 2017. 33(6):  
648 P. E2894.
- 649 2. Zhang, Z., Et Al., The Dynamin-Related Gtpase Opa1 Is Required For Glucose-  
650 Stimulated ATP Production In Pancreatic Beta Cells. *Mol Biol Cell*, 2011.  
651 22(13): P. 2235-45.
- 652 3. Anderson, A.J., Et Al., Mitochondria-Hubs For Regulating Cellular  
653 Biochemistry: Emerging Concepts And Networks. *Open Biology*, 2019. 9(8): P.  
654 190126-190126.
- 655 4. Rutter, G.A., Et Al., Pancreatic B-Cell Identity, Glucose Sensing And The  
656 Control Of Insulin Secretion. *Biochem J*, 2015. 466(2): P. 203-18.
- 657 5. Rorsman, P. And F.M. Ashcroft, Pancreatic B-Cell Electrical Activity And Insulin  
658 Secretion: Of Mice And Men. *Physiol Rev*, 2018. 98(1): P. 117-214.
- 659 6. Henquin, J.C., Triggering And Amplifying Pathways Of Regulation Of Insulin  
660 Secretion By Glucose. *Diabetes*, 2000. 49(11): P. 1751-60.
- 661 7. Nauck, M.A., Et Al., GLP-1 Receptor Agonists In The Treatment Of Type 2  
662 Diabetes - State-Of-The-Art. *Mol Metab*, 2020: P. 101102.
- 663 8. Jones, B., Et Al., Control Of Insulin Secretion By GLP-1. *Peptides*, 2018. 100:  
664 P. 75-84.
- 665 9. Supale, S., Et Al., Mitochondrial Dysfunction In Pancreatic Beta Cells. *Trends*  
666 *Endocrinol Metab*, 2012. 23(9): P. 477-87.
- 667 10. Rutter GA, Et Al., Metabolic And Functional Specialisations Of The Pancreatic  
668 Beta Cell: Gene Disallowance, Mitochondrial Metabolism And Intercellular  
669 Connectivity. *Diabetologia Under Review*, 2020.
- 670 11. Van Den Ouweland, J.M., Et Al., Functional And Morphological Abnormalities  
671 Of Mitochondria Harboring The Trna(Leu)(UUR) Mutation In Mitochondrial  
672 DNA Derived From Patients With Maternally Inherited Diabetes And Deafness  
673 (MIDD) And Progressive Kidney Disease. *Diabetologia*, 1999. 42(4): P. 485-92.
- 674 12. Haythorne, E., Et Al., Diabetes Causes Marked Inhibition Of Mitochondrial  
675 Metabolism In Pancreatic B-Cells. *Nat Commun*, 2019. 10(1): P. 2474.
- 676 13. Yang, D., Et Al., Mitochondrial Dynamics: A Key Role In Neurodegeneration  
677 And A Potential Target For Neurodegenerative Disease. *Frontiers In*  
678 *Neuroscience*, 2021. 15(359).
- 679 14. Rutter, G.A. And R. Rizzuto, Regulation Of Mitochondrial Metabolism By ER  
680 Ca<sup>2+</sup> Release: An Intimate Connection. *Trends In Biochemical Sciences*, 2000.  
681 25(5): P. 215-221.
- 682 15. Westermann, B., Bioenergetic Role Of Mitochondrial Fusion And Fission.  
683 *Biochim Biophys Acta*, 2012. 1817(10): P. 1833-8.
- 684 16. Ma, K., Et Al., Mitophagy, Mitochondrial Homeostasis, And Cell Fate. *Front Cell*  
685 *Dev Biol*, 2020. 8: P. 467.
- 686 17. Filadi, R., Et Al., On The Role Of Mitofusin 2 In Endoplasmic Reticulum-  
687 Mitochondria Tethering. *Proc Natl Acad Sci U S A*, 2017. 114(12): P. E2266-  
688 E2267.
- 689 18. Rovira-Llopis, S., Et Al., Mitochondrial Dynamics In Type 2 Diabetes:  
690 Pathophysiological Implications. *Redox Biol*, 2017. 11: P. 637-645.
- 691 19. Serasinghe, M.N. And J.E. Chipuk, Mitochondrial Fission In Human Diseases.  
692 *Handb Exp Pharmacol*, 2017. 240: P. 159-188.

- 693 20. Gao, Y., Et Al., Evaluation Of Mitochondrial Divisions In Mouse With Type-2  
694 Diabetes And Effect Of Glucose-Oxidase On Mouse Islet Cells RIN-M5f. *Cell*  
695 *Biol Int*, 2014. 38(3): P. 368-73.
- 696 21. Safia Costes, T.G., Alexandra E Butler, Sam Sereda, Orian Shirihai And Peter  
697 Cawood Butler, Disruption Of The Endoplasmic Reticulum-Mitochondria  
698 Interface By Toxic IAPP Oligomers May Compromise Beta-Cell Mitochondrial  
699 Network Integrity And Function In Type 2 Diabetes, In *The Endocrine Society*  
700 *Annual Meeting*, E. Society, Editor. 2015: San Diego.
- 701 22. Ravier, M.A. And G.A. Rutter, Isolation And Culture Of Mouse Pancreatic Islets  
702 For Ex Vivo Imaging Studies With Trappable Or Recombinant Fluorescent  
703 Probes. *Methods Mol Biol*, 2010. 633: P. 171-84.
- 704 23. Georgiadou, E., Et Al., The Pore-Forming Subunit MCU Of The Mitochondrial  
705  $Ca^{2+}$  Uniporter Is Required For Normal Glucose-Stimulated Insulin Secretion  
706 In Vitro And In Vivo In Mice. *Diabetologia*, 2020. 63(7): P. 1368-1381.
- 707 24. Tarasov, A.I., Et Al., The Mitochondrial  $Ca^{2+}$  Uniporter MCU Is Essential For  
708 Glucose-Induced ATP Increases In Pancreatic B-Cells. *PLOS ONE*, 2012. 7(7):  
709 P. E39722.
- 710 25. Li, D., Et Al., Imaging Dynamic Insulin Release Using A Fluorescent Zinc  
711 Indicator For Monitoring Induced Exocytotic Release (ZIMIR). *Proc Natl Acad*  
712 *Sci U S A*, 2011. 108(52): P. 21063-8.
- 713 26. Johnston, N.R., Et Al., Beta Cell Hubs Dictate Pancreatic Islet Responses  
714 To Glucose. *Cell Metab*, 2016. 24(3): P. 389-401.
- 715 27. Salem, V., Et Al., Leader B-Cells Coordinate  $Ca^{2+}$  Dynamics Across  
716 Pancreatic Islets In Vivo. *Nature Metabolism*, 2019. 1(6): P. 615-629.
- 717 28. Cruciani-Guglielmacci, C., Et Al., Molecular Phenotyping Of Multiple Mouse  
718 Strains Under Metabolic Challenge Uncovers A Role For Elov12 In Glucose-  
719 Induced Insulin Secretion. *Molecular Metabolism*, 2017.
- 720 29. Elayat, A.A., M.M. El-Naggar, And M. Tahir, An Immunocytochemical And  
721 Morphometric Study Of The Rat Pancreatic Islets. *J Anat*, 1995. 186 ( Pt 3)(Pt  
722 3): P. 629-37.
- 723 30. Pullen, T.J., M.O. Huising, And G.A. Rutter, Analysis Of Purified Pancreatic Islet  
724 Beta And Alpha Cell Transcriptomes Reveals  $11\beta$ -Hydroxysteroid  
725 Dehydrogenase (Hsd11b1) As A Novel Disallowed Gene. *Frontiers In Genetics*,  
726 2017. 8(41).
- 727 31. McCormack, J.G., A.P. Halestrap, And R.M. Denton, Role Of Calcium Ions In  
728 Regulation Of Mammalian Intramitochondrial Metabolism. *Physiol Rev*, 1990.  
729 70(2): P. 391-425.
- 730 32. Soleimanpour, S.A., Et Al., The Diabetes Susceptibility Gene Clec16a  
731 Regulates Mitophagy. *Cell*, 2014. 157(7): P. 1577-1590.
- 732 33. Cruciani-Guglielmacci, C., Et Al., Molecular Phenotyping Of Multiple Mouse  
733 Strains Under Metabolic Challenge Uncovers A Role For Elov12 In Glucose-  
734 Induced Insulin Secretion. *Molecular Metabolism*, 2017. 6(4): P. 340-351.
- 735 34. Benner, C., Et Al., The Transcriptional Landscape Of Mouse Beta Cells  
736 Compared To Human Beta Cells Reveals Notable Species Differences In Long  
737 Non-Coding RNA And Protein-Coding Gene Expression. *BMC Genomics*,  
738 2014. 15(1): P. 620.
- 739 35. Sidarala, V., Et Al., Mitofusins 1 And 2 Collaborate To Fuel Pancreatic Beta Cell  
740 Insulin Release Via Regulation Of Both Mitochondrial Structure And DNA  
741 Content. *Biorxiv*, 2021: P. 2021.01.10.426151.

- 742 36. Reinhardt, F., Et Al., Drp1 Guarding Of The Mitochondrial Network Is Important  
743 For Glucose-Stimulated Insulin Secretion In Pancreatic Beta Cells. *Biochem*  
744 *Biophys Res Commun*, 2016. 474(4): P. 646-651.
- 745 37. Hennings, T.G., Et Al., In Vivo Deletion Of Beta-Cell Drp1 Impairs Insulin  
746 Secretion Without Affecting Islet Oxygen Consumption. *Endocrinology*, 2018.  
747 159(9): P. 3245-3256.
- 748 38. Stiles, L. And O.S. Shirihai, Mitochondrial Dynamics And Morphology In Beta-  
749 Cells. *Best Pract Res Clin Endocrinol Metab*, 2012. 26(6): P. 725-38.
- 750 39. Holz, G.G. And J.F. Habener, Signal Transduction Crosstalk In The Endocrine  
751 System: Pancreatic Beta-Cells And The Glucose Competence Concept. *Trends*  
752 *Biochem Sci*, 1992. 17(10): P. 388-93.
- 753 40. Leech, C.A., O.G. Chepurny, And G.G. Holz, Epac2-Dependent Rap1  
754 Activation And The Control Of Islet Insulin Secretion By Glucagon-Like Peptide-  
755 1. *Vitam Horm*, 2010. 84: P. 279-302.
- 756 41. Tsuboi, T. And G.A. Rutter, Multiple Forms Of "Kiss-And-Run" Exocytosis  
757 Revealed By Evanescent Wave Microscopy. *Curr Biol*, 2003. 13(7): P. 563-7.
- 758 42. Alenkvist, I., Et Al., Recruitment Of Epac2A To Insulin Granule Docking Sites  
759 Regulates Priming For Exocytosis. *Diabetes*, 2017. 66(10): P. 2610-2622.
- 760 43. Takahashi, N., Et Al., Post-Priming Actions Of ATP On Ca<sup>2+</sup>-Dependent  
761 Exocytosis In Pancreatic Beta Cells. *Proc Natl Acad Sci U S A*, 1999. 96(2): P.  
762 760-5.
- 763 44. Idevall-Hagren, O. And A. Tengholm, Metabolic Regulation Of Calcium  
764 Signaling In Beta Cells. *Seminars In Cell & Developmental Biology*, 2020. 103:  
765 P. 20-30.
- 766 45. Peyot, M.-L., Et Al., Glucagon-Like Peptide-1 Induced Signaling And Insulin  
767 Secretion Do Not Drive Fuel And Energy Metabolism In Primary Rodent  
768 Pancreatic Beta-Cells. *Plos One*, 2009. 4(7): P. E6221-E6221.
- 769 46. Rutter, G.A., Et Al., Metabolic And Functional Specialisations Of The Pancreatic  
770 Beta Cell: Gene Disallowance, Mitochondrial Metabolism And Intercellular  
771 Connectivity. *Diabetologia*, 2020. 63(10): P. 1990-1998.
- 772 47. Andersén, E., G. Karlaganis, And J. Sjövall, Altered Bile Acid Profiles In  
773 Duodenal Bile And Urine In Diabetic Subjects. *Eur J Clin Invest*, 1988. 18(2):  
774 P. 166-72.
- 775 48. Staels, B. And V.A. Fonseca, Bile Acids And Metabolic Regulation.  
776 Mechanisms And Clinical Responses To Bile Acid Sequestration, 2009.  
777 32(Suppl 2): P. S237-S245.
- 778 49. Uchida, K., S. Makino, And T. Akiyoshi, Altered Bile Acid Metabolism In  
779 Nonobese, Spontaneously Diabetic (NOD) Mice. *Diabetes*, 1985. 34(1): P. 79-  
780 83.

781  
782

783 **Figure legends**

784

785 **Fig.1 Generation of a conditional  $\beta Mfn1/2$  dKO mouse line which displays a**  
786 **highly impaired glucose tolerance *in vivo*.** (A) qRT-PCR quantification of *Mfn1*,  
787 *Mfn2*, *Drp1*, *Opa1* and *Fis1* expression in control and dKO islets relative to  $\beta$ -actin  
788 ( $n=3-5$  mice per genotype in two independent experiments).(B) Western blot analysis  
789 demonstrating efficient MFN1 (84 kDa) and MFN2 (86 kDa) deletion relative to  
790 GAPDH (36 kDa) in isolated islets ( $n=3-4$  mice per genotype in three independent  
791 experiments).(C) Glucose tolerance was measured in dKO mice and littermate  
792 controls by IPGTT (1 g/kg body weight).(D) Corresponding AUC from (C) ( $n=8$  mice  
793 per genotype, in 2 independent experiments). (E) Glucose tolerance measured by  
794 IPGTT (using 3 g/kg body weight) and (F) the corresponding AUC were assessed in  
795  $\beta Mfn1/2$  dKO and control mice ( $n=8$  mice per genotype in two independent  
796 experiments). (G) Plasma insulin levels during IPGTT in dKO and control mice ( $n=11-$   
797  $12$  mice per genotype in three independent experiments) and (H) the corresponding  
798 AUC. (I) Glucose tolerance post-oral gavage (3 g/kg body weight) was measured in  
799  $n=8$  animals per genotype in two independent experiments. The corresponding AUC  
800 is shown in (J). (K) Plasma insulin levels during OGTT in dKO and control mice ( $n=8$   
801 mice per genotype in two independent experiments) and (L) the corresponding AUC.  
802 (Blue, control mice; red, dKO mice. Data are presented as mean $\pm$ SEM. \* $p<0.05$ ;  
803 \*\* $p<0.01$ ; \*\*\* $p<0.001$ ; \*\*\*\* $p<0.0001$  as indicated, or control vs dKO mice at the time  
804 points as indicated in (K), analysed by unpaired two-tailed Student's t-test and Mann–  
805 Whitney correction or two-way ANOVA test and Sidak's multiple comparisons test. All  
806 experiments were performed in 14-week-old male mice.

807

808 **Fig.2 Mitochondrial ultrastructure is altered following *Mfn1/2* deletion.** (A)  
809 Confocal images of the mitochondrial network of dissociated beta cells stained with  
810 Mitotracker green; scale bar: 5  $\mu$ m. Lower right panels: magnification of selected  
811 areas. (B) Mitochondrial morphology analysis on deconvolved confocal images of  
812 dissociated beta cells. A macro was developed to quantify the number of mitochondria  
813 per cell and measure the elongation, perimeter and circularity (0: elongated; 1: circular  
814 mitochondria) of the organelles in control and dKO animals ( $n=40-54$  cells;  $n=3$  mice  
815 per genotype). (C) Electron micrographs of mitochondria indicated with black arrows  
816 in islets isolated from control and dKO mice; scale bars: 1 $\mu$ m. Right panel:

817 magnification of selected areas showing the cristae structure (black arrow heads);  
818 scale bar: 0.5  $\mu\text{m}$ . Schematic representation of enlarged mitochondria. Data are  
819 presented as mean $\pm$ SEM. \*\*\*\* $p < 0.0001$  as indicated, analysed by unpaired two-tailed  
820 Student's t-test and Mann–Whitney correction. Experiments were performed in 14-  
821 week-old male mice.

822

823 **Fig.3 Absence of *Mfn1/2* in beta cells leads to decreased beta cell mass and**  
824 **increased beta cell apoptosis.**(A) Representative pancreatic sections  
825 immunostained with glucagon (red) and insulin (green); scale bars: 50 $\mu\text{m}$ .(B) The beta  
826 cell and alpha cell surface (C) measured within the whole pancreatic area in control  
827 and dKO mice were determined, as well as the beta/alpha cell ratio in (D), ( $n=79-86$   
828 islets, 4 mice per genotype; experiment performed in triplicate).(E) Representative  
829 confocal images of islets with TUNEL positive (green) apoptotic beta cells (ROI) and  
830 insulin (red). Magnification of selected area displaying each fluorescent channel; scale  
831 bar: 5 $\mu\text{m}$ . DNase I treated sections were used as a positive control in the TUNEL  
832 assay. Scale bars: 20 $\mu\text{m}$ .(F) Quantification of the percentage of islets containing  
833 TUNEL positive cells ( $n=114-133$  islets, 4 mice per genotype; experiment performed  
834 in triplicate). Data are presented as mean $\pm$ SEM. \* $p < 0.05$ , assessed by unpaired two-  
835 tailed Student's t-test and Mann–Whitney correction. Experiments were performed in  
836 14-week-old male mice.

837

838 **Fig.4 Deletion of *Mfn1/2* impairs beta cell function *in vivo*. Representative *in***  
839 ***vivo* images of GCaMP6s labelled islets and TMRM stained mitochondria**  
840 **surrounded by their vasculature in control and dKO mice.** (A) Representative  
841 traces depicting fluorescence intensity of cytosolic  $\text{Ca}^{2+}$  (GCaMP6s) and mitochondrial  
842 TMRM signals in control (ESM Video 1) and (B) dKO animals (ESM Video 2) before  
843 and after glucose injection as indicated; scale bars: 45  $\mu\text{m}$ ; ( $n=2$  animals per  
844 genotype). (C) AUC of fold change measurements above baseline for each GCaMP6s  
845 and (D) TMRM traces measured ( $n=4-15$  total responding cells). Under these  
846 conditions, glucose concentrations in control mice were  $17.1 \pm 2.5$  mmol/l and  $32.1 \pm 3.9$   
847 mmol/l in dKO animals after glucose injection. Analysis was performed on the most  
848 responsive beta cells where oscillations could be detected in both groups.Green,  
849 GCaMP6s; red, TMRM signals. Data are presented as mean $\pm$ SEM. \*\*\* $p < 0.001$ ,



850 assessed by unpaired two-tailed Student's t-test and Mann–Whitney correction.  
851 Experiments were performed in 20-week-old male mice.

852

853 **Fig.5 *Mfn1/2* deletion from pancreatic beta cells impairs cytosolic and**  
854 **mitochondrial  $\text{Ca}^{2+}$  uptake and changes mitochondrial potential and ATP**  
855 **synthesis *in vitro*.** (A) Each snapshot of isolated control (i–iv) and dKO-derived (v–  
856 viii) islets was taken during the time points indicated by the respective arrows in (B).  
857 Scale bar: 50  $\mu\text{m}$ . See also ESM Video 3. (B)  $[\text{Ca}^{2+}]_{\text{cyt}}$  traces in response to 3G, 3  
858 mmol/l glucose, 17 mmol/l glucose (17G; with or without diazoxide [diaz]) or 20 mmol/l  
859 KCl with diaz were assessed following Cal-520 uptake in whole islets. Traces  
860 represent mean normalised fluorescence intensity over time ( $F/F_{\text{min}}$ ). (C) The  
861 corresponding AUC is also presented ( $n=17-26$  islets, 4 mice per genotype); 17G AUC  
862 measured between 245 s and 1045 s, 17G+diaz AUC measured between 1200 s and  
863 1320 s, and KCl+diaz AUC measured between 1424 s and 1500 s. For each genotype  
864 different baselines (ctrl diaz/KCl: 0.95, dKO diaz/KCl: 0.8 were taken into consideration  
865 to measure AUCs). (D) Each snapshot of isolated control (i–iv) and dKO-derived (v–viii)  
866 islets was taken during the time points indicated by the respective arrows in (E). Scale  
867 bar: 50  $\mu\text{m}$ . See also ESM Video 4. (E)  $[\text{Ca}^{2+}]_{\text{mito}}$  changes in response to 17G (with or  
868 without diazoxide [diaz]) and 20 mmol/l KCl were assessed in islets following R-GECO  
869 infection. Traces represent mean normalised fluorescence intensity over time  
870 ( $F/F_{\text{min}}$ ). (F) The corresponding AUC is also shown ( $n=20-23$  islets, 3 mice *per*  
871 genotype; 17G AUC measured between 270 s and 1100 s, 17G+diaz AUC measured  
872 between 1101 s and 1365 s and KCl AUC measured between 1366 s and 1500 s). (G)  
873 Dissociated beta cells were loaded with TMRE to measure changes in  $\Delta\psi_{\text{m}}$ , and  
874 perfused with 3 mmol/l glucose (3G), 17G or FCCP as indicated. Traces represent  
875 normalised fluorescence intensity over time ( $F/F_{\text{min}}$ ). (H) AUC was measured between  
876 700–730 s (under 17G exposure) from the data shown in (G) ( $n=146-254$  cells, 3-6  
877 mice per genotype). (I) Changes in the cytoplasmic ATP:ADP ratio ( $[\text{ATP}:\text{ADP}]$ ) in  
878 response to 17 mmol/l glucose (17G) was examined in whole islets using the ATP  
879 sensor Perceval. (J) AUC values corresponding to (I) were measured between 418–  
880 1400 s (under 17G exposure) (data points from  $n=22-23$  islets, 3-6 mice per genotype).  
881 Data are presented as mean  $\pm$  SEM. \* $p < 0.05$ , \*\* $p < 0.01$ , assessed by unpaired two-  
882 tailed Student's t-test and Mann–Whitney correction or two-way ANOVA test and

883 Sidak's multiple comparisons test. Experiments were performed in 14-week-old male  
884 mice.

885

886 **Fig.6 O<sub>2</sub> consumption and mtDNA are deleteriously affected when *Mfn1/2* are**  
887 **abolished in beta cells, while [Ca<sup>2+</sup>]<sub>ER</sub> mobilisation remains unchanged.** (A) Each

888 snapshot of isolated control (i-v) and dKO-derived (vi-x) islets was taken during the  
889 time points indicated by the respective arrows in (B). Scale bar: 50 μm. See also ESM

890 Video 5. (B) Changes in [Ca<sup>2+</sup>]<sub>ER</sub> were measured in whole islets incubated with Cal-  
891 520 and perfused with 17 mmol/l glucose (17G; with or without diazoxide [diaz]), 17G

892 with 0.1 mmol/l acetylcholine (Ach) and diaz, or 20 mmol/l KCl with diaz (C) AUC  
893 values corresponding to (B) were measured (17G AUC measured between 260 s and

894 740 s, 17G+diaz AUC measured between 846 s and 1020 s, 17G+diaz+Ach AUC  
895 measured between 1021 s and 1300 s and KCl AUC measured between 1301 s and

896 1500 s) (n=29-31 islets, 3 mice per genotype). (D) Representative oxygen  
897 consumption rate (OCR) traces of islets (~10 per well) were acutely exposed to 20

898 mmol/l glucose (final concentration), Oligomycin A (Oligo), FCCP, and Rotenone with  
899 Antimycin A (AA) (performed in triplicate, in two independent experiments).(E)

900 Average values for each condition corresponding to (D).(F) The relative mitochondrial  
901 DNA copy number was measured by determining the ratio of the mtDNA-encoded

902 gene *mt-Nd1* to the nuclear gene *Ndufv1* (n=3 mice per genotype).Data are presented  
903 as mean±SEM. \*p<0.05, assessed by unpaired two-tailed Student's t-test and Mann-

904 Whitney correction or two-way ANOVA test and Sidak's multiple comparisons test.  
905 Experiments were performed in 14-week-old male mice.

906

907 **Fig.7 Impaired insulin secretion can be rescued by GLP-1R agonists *in vitro* by**  
908 **increasing cytosolic Ca<sup>2+</sup> oscillation frequency.** (A) Insulin secretion measured

909 during serial incubations in batches in 3 mmol/l glucose (3G), 10 mmol/l glucose (10G),  
910 or 100 nmol/l exendin-4 (ex4), GLP-1 or GIP in presence of 10G or 17 mmol/l glucose

911 (17G) (n=4-7 mice per genotype in two independent experiments).(B) Insulin secretion  
912 measured during serial incubations in batches in 10 mmol/l glucose (10G),

913 supplemented with 100 nmol/l exendin-4 (ex4), 10 μmol/l FSK or 100 μmol/l IBMX and  
914 20 mmol/l KCl (n=3 mice per genotype, in two independent experiments). (C) [Ca<sup>2+</sup>]<sub>cyt</sub>

915 changes in response to 3G, 3 mmol/l glucose, 10 mmol/l glucose (10G; with or without  
916 exendin-4 [ex4]) or 20 mmol/l KCl were assessed following Cal-520 uptake in whole

917 islets. Traces represent mean normalised fluorescence intensity over time ( $F/F_{\min}$ ).  
918 See also ESM video 6. Dashed ROIs represent fluorescent segments of extended time  
919 scales. Both control and dKO traces reveal faster oscillatory frequencies in response  
920 to exendin-4. (D) The corresponding AUC is also presented ( $n=19-20$  islets, 3 mice  
921 per genotype; 10G AUC measured between 200 s and 660 s, 10G+ex4 AUC  
922 measured between 800 s and 950 s), and KCl AUC measured between 1200 s and  
923 1500 s). (E) Dissociated beta cells were loaded with D4ER to measure changes in  
924  $[Ca^{2+}]_{ER}$ , and perfused with 10 mmol/l glucose (10G), 10G+ex4 or thapsigargin  
925 (10G+thapsi) as indicated. Traces represent corrected ratio values post-linear fitting  
926 over time. (F) AUC was measured between 350–900 s (under 10G+ex4) and 900-  
927 1300 s (10G+thapsi) from the data shown in (E) ( $n=44-46$  cells, 4-5 mice per  
928 genotype). (G) Changes in cytoplasmic ATP:ADP ratio ([ATP:ADP]) in response to  
929 10G or 10G with 100nmol/l ex4 was examined in whole islets. (H) AUC values  
930 corresponding to (G) were measured between 185-720s (under 10G exposure) or 721-  
931 1200s (under 10G with ex4) (data points from  $n=3$  mice per genotype). (I) Average  
932 OCR values of islets (~10 per well) that were exposed to 3mmol/l or 10mmol/l glucose  
933 (final concentration), 10mmol/l glucose supplemented with ex4, FSK, Oligomycin A  
934 (Oligo), FCCP, and Rotenone with Antimycin A (AA) ( $n=3$  mice per genotype;  
935 experiment performed in duplicate). Data are presented as mean $\pm$ SEM.  
936 \* $p<0.05$ ; \*\* $p<0.01$ , \*\*\*\* $p<0.0001$  assessed by two-way ANOVA test and Sidak's  
937 multiple comparisons test. Experiments were performed in 14-week-old male mice.

938

939 **Fig.8 The GLP1-R agonist, exendin-4, improves intercellular connectivity in**  
940  **$\beta$ Mfn1/2 dKO  $\beta$ -cells.** (A) Representative cartesian maps of control and dKO islets  
941 with colour coded lines connecting cells according to the strength of Pearson analysis  
942 (colour coded  $r$  values from 0 to 1, blue to red respectively) under 10mmol/L (10G),  
943 10mmol/L with 100nmol/l exendin-4 (10G+ex4) glucose or 20mmol/L KCl; scale bars:  
944 40  $\mu$ m. (B) Representative heatmaps depicting connectivity strength ( $r$ ) of all cell pairs  
945 according to the colour coded  $r$  values from 0 to 1, blue to yellow respectively. (C)  
946 Percentage of connected cell pairs at 10G, 10G+ex4 or KCl ( $n=19-20$  islets, 3 mice  
947 per genotype). (D)  $r$  values between  $\beta$ -cells in response to glucose, exendin-4 or KCl  
948 ( $n=3$  mice per genotype). Data are presented as mean $\pm$ SEM. \* $p<0.05$ , \*\* $p<0.01$ ,

949 \*\*\* $p < 0.001$  assessed by two-way ANOVA test and Sidak's multiple comparisons test.

950 Experiments were performed in 14-week-old male mice.

951

952 **Fig.9 Insulin secretion is rescued through an EPAC-dependent activation in dKO**

953 **islets.** (A) Concentration of cAMP (normalised to FSK) in response to 1,10,100 nmol/l

954 GLP-1, ex4 and GIP stimulation in dissociated islets ( $n=6-7$  animals, in 2 independent

955 experiments). (B) Insulin secretion measured during serial incubations in batches in 3

956 mmol/l glucose (3G), 10 mmol/l glucose (10G), or 10 mmol/l glucose supplemented

957 with 10 $\mu$ mol/l H89, 10  $\mu$ mol/l FSK with 100  $\mu$ mol/l IBMX or H89 ( $n=3$  mice per

958 genotype, in two independent experiments). (C) Insulin secretion measured during

959 serial incubations in batches in 10 mmol/l glucose (10G), or 10 mmol/l glucose

960 supplemented with 6 $\mu$ mol/l EPAC-activator, or EPAC-activator with 10 $\mu$ mol/l H89 ( $n=3$

961 mice per genotype, in two independent experiments). Data are presented as

962 mean $\pm$ SEM. \* $p < 0.05$ , \*\* $p < 0.01$ , \*\*\* $p < 0.001$  assessed by two-way ANOVA test and

963 Sidak's multiple comparisons test. Experiments were performed in 14-week-old male

964 mice.

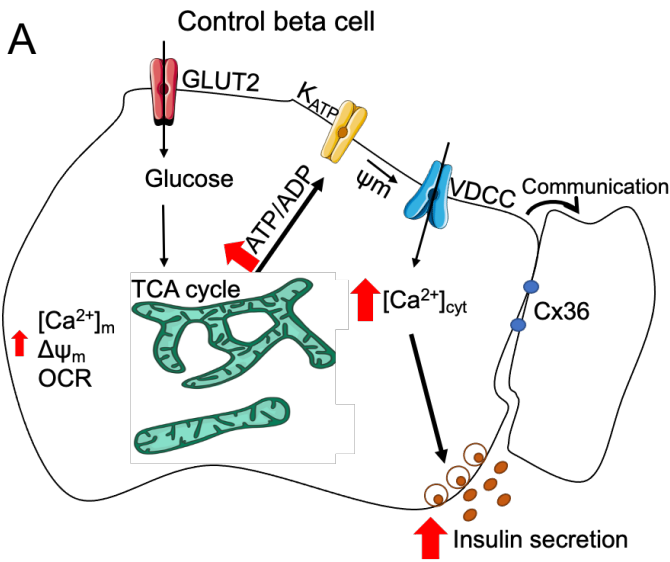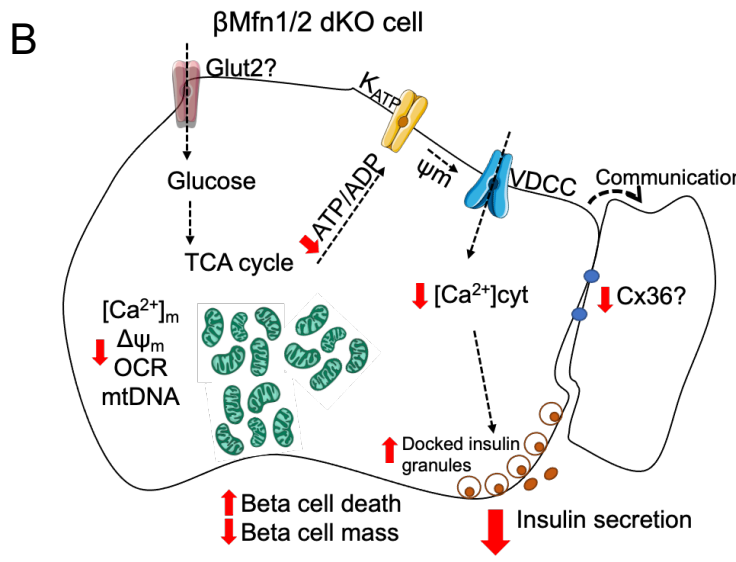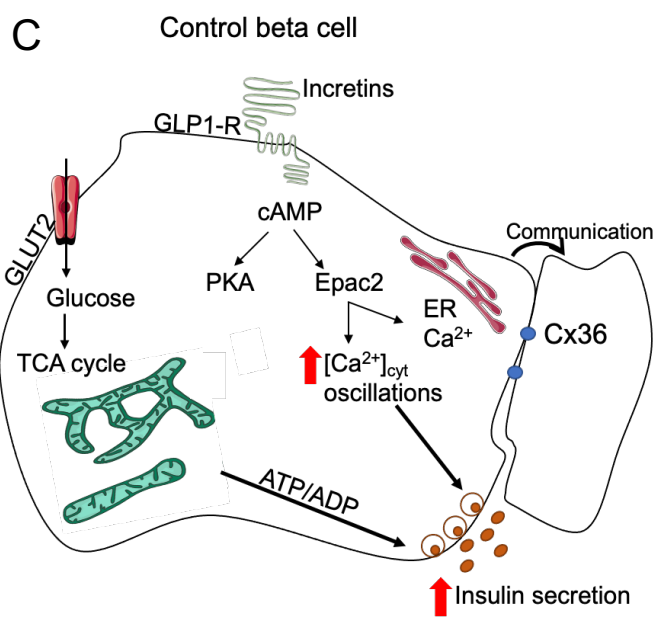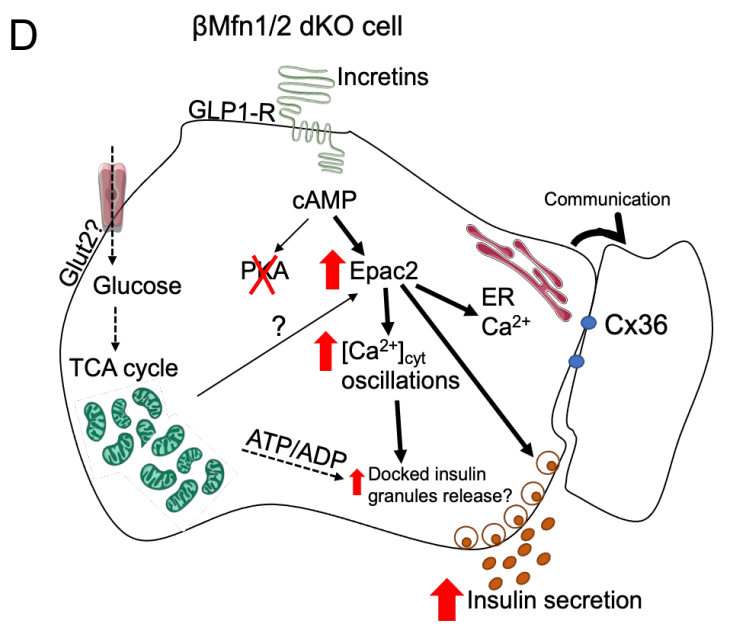

Graphical abstract

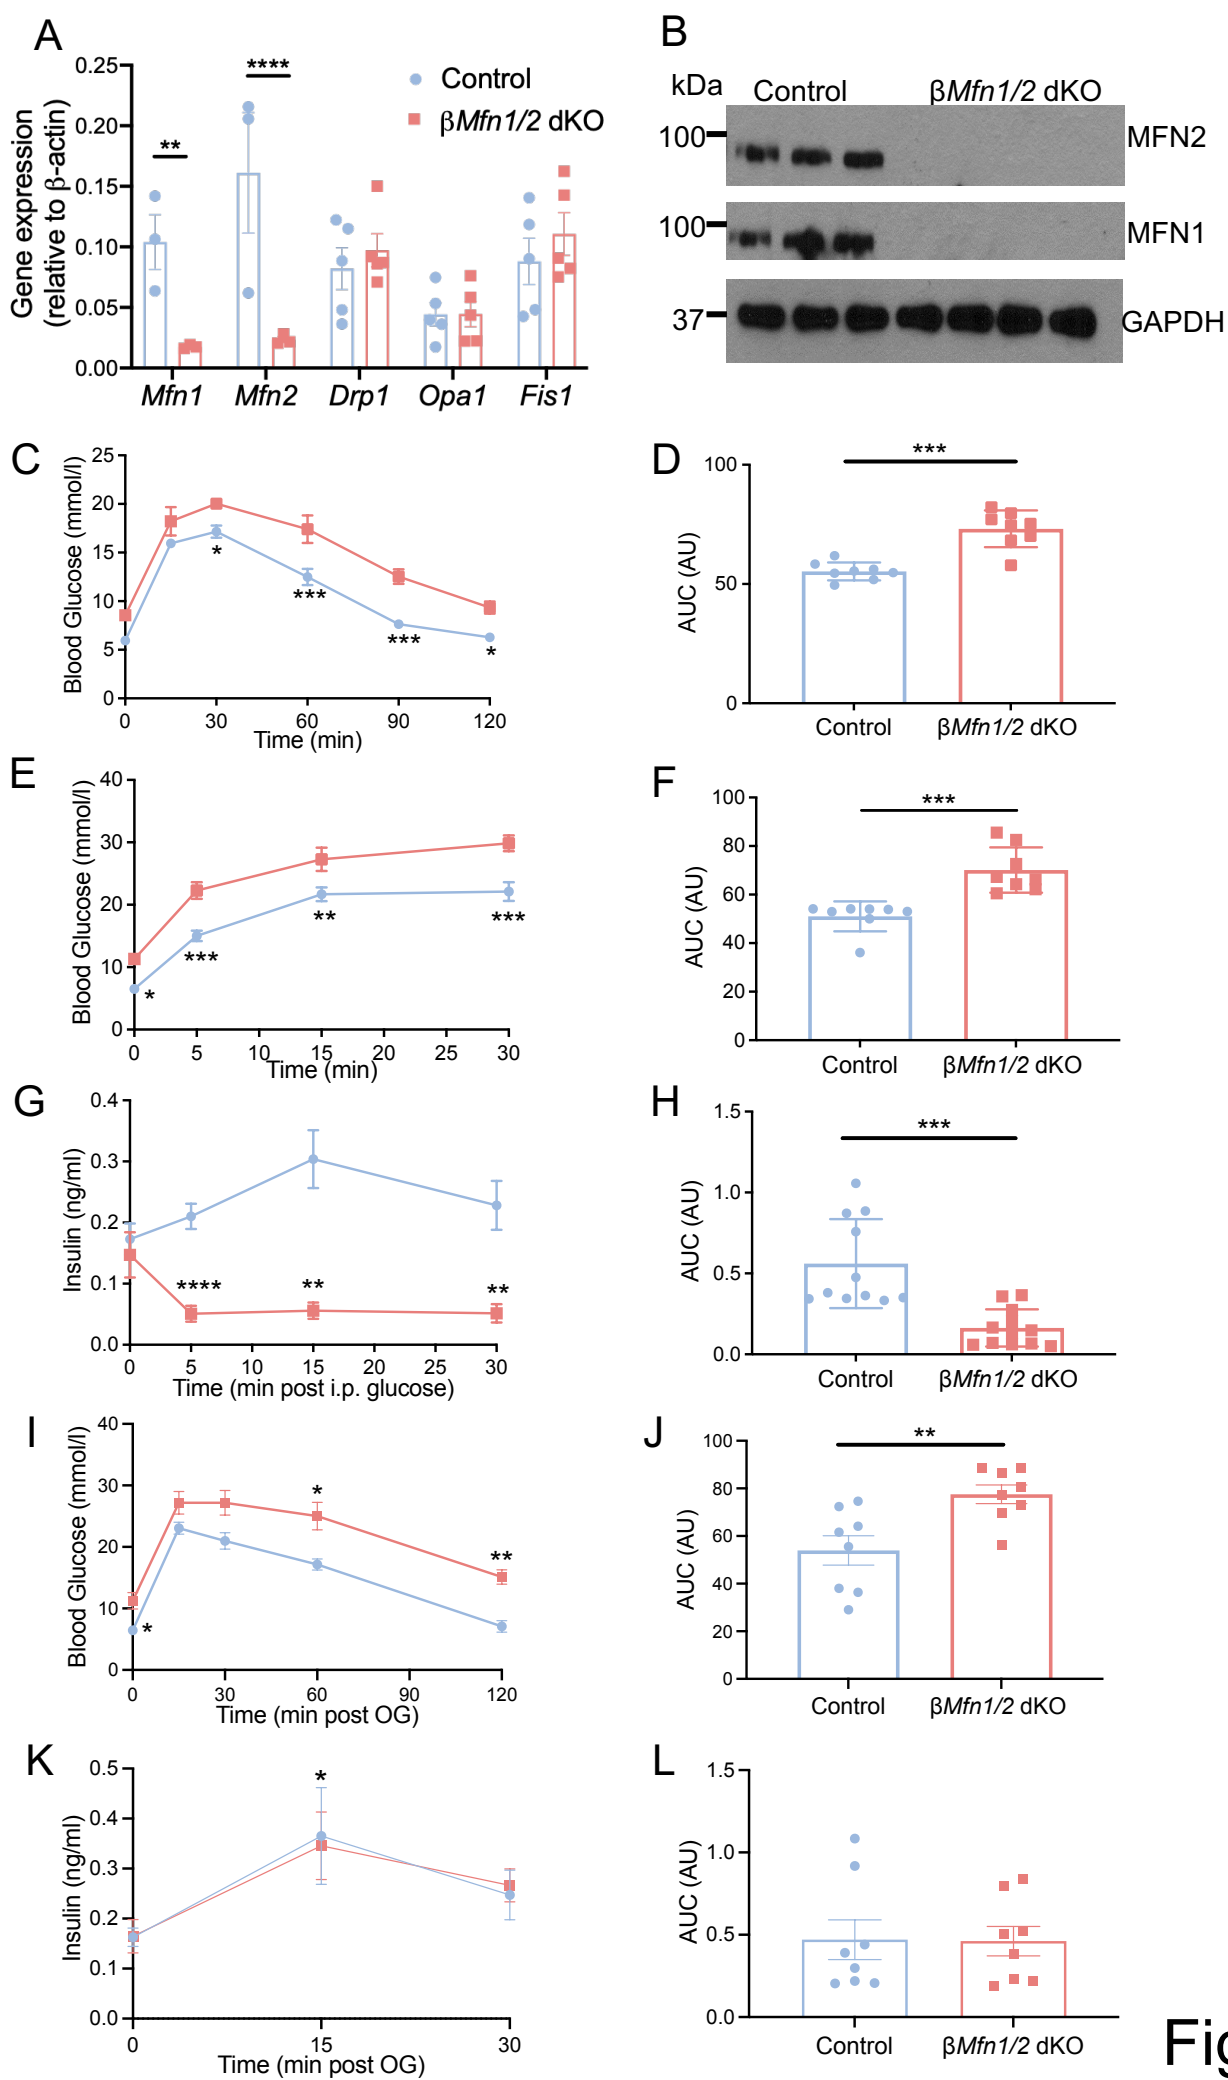

**Fig. 1**

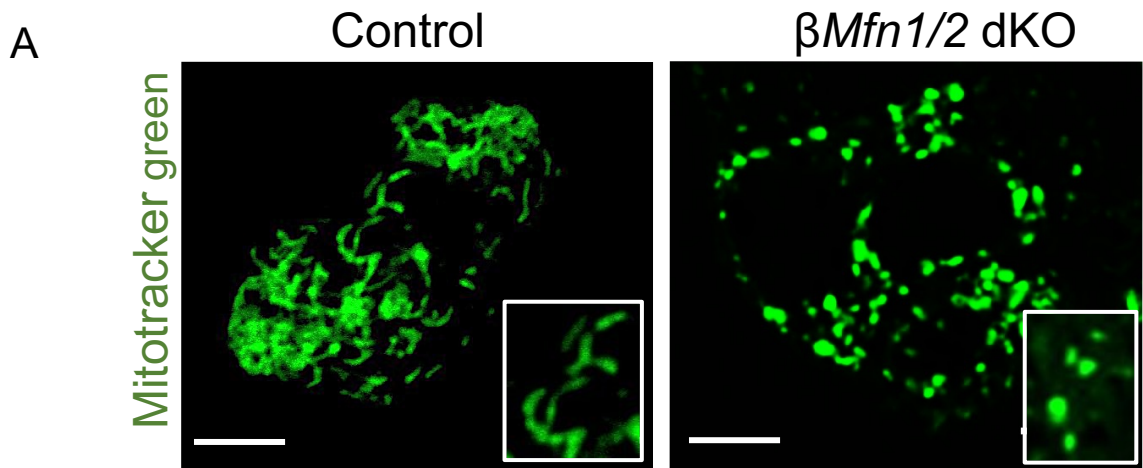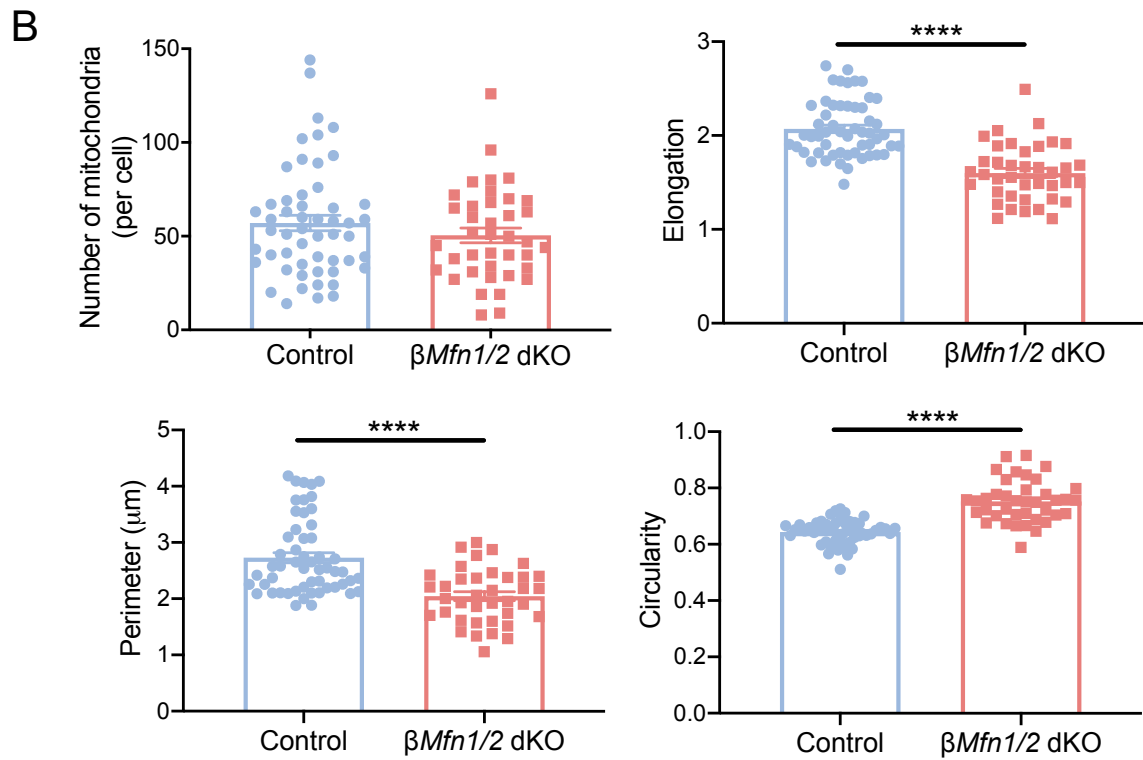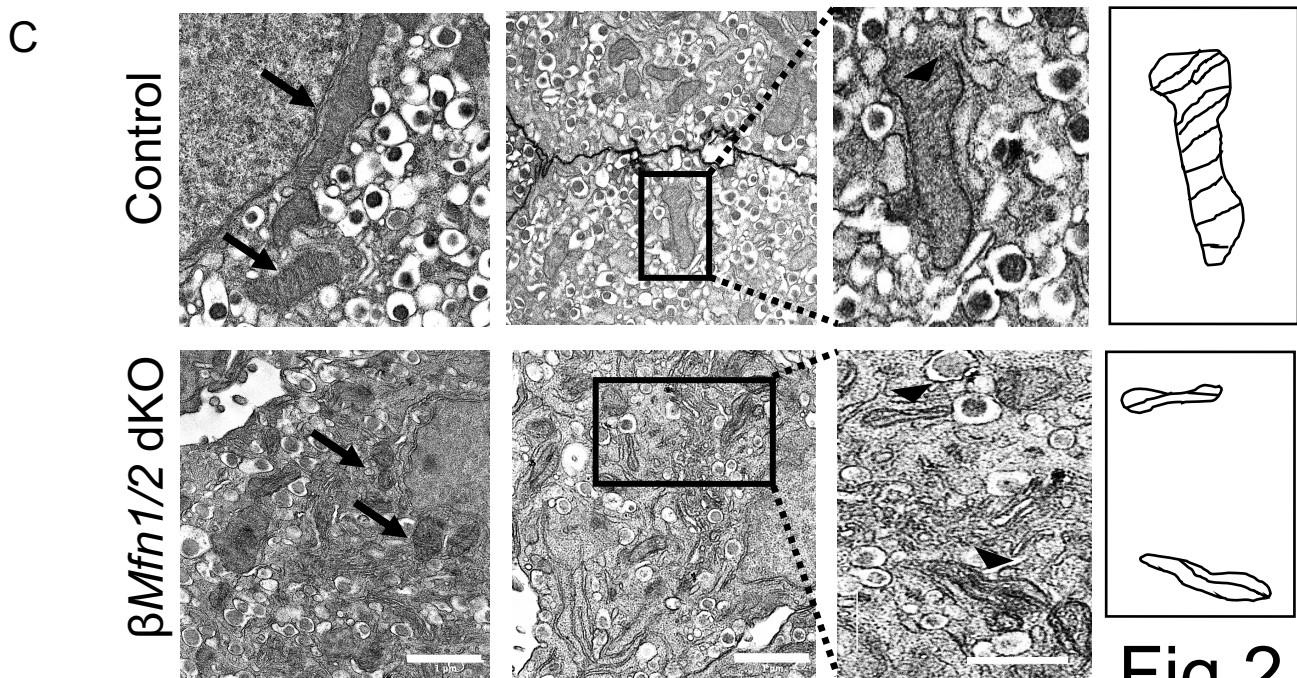

**Fig.2**

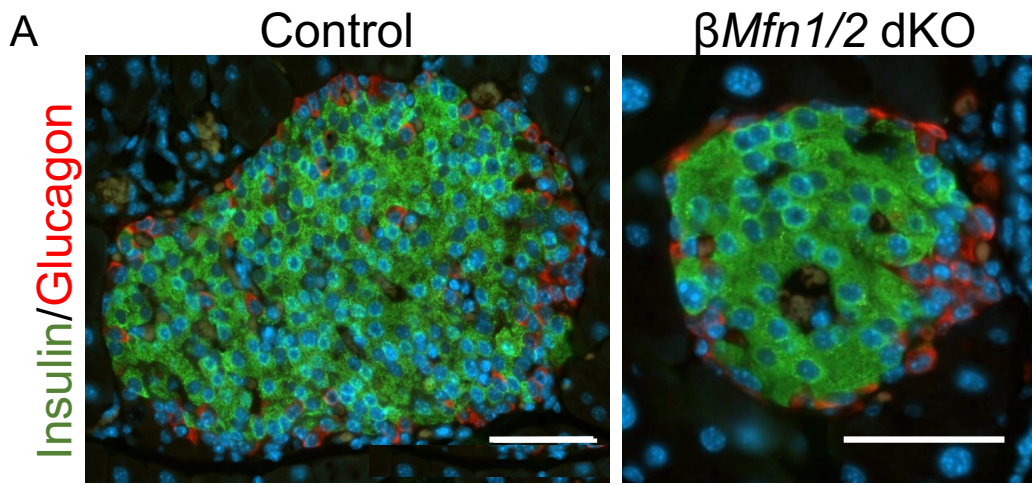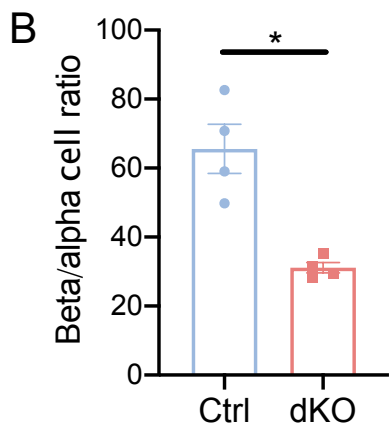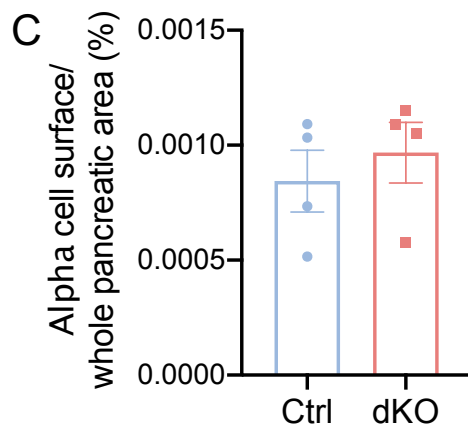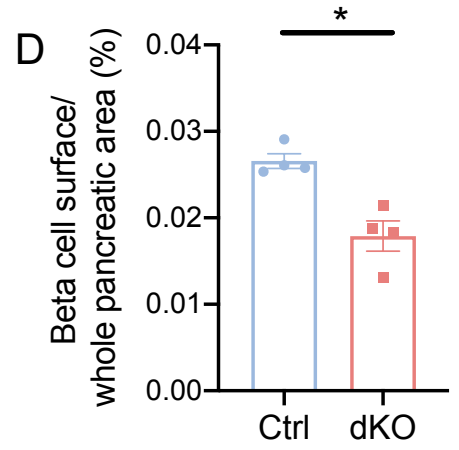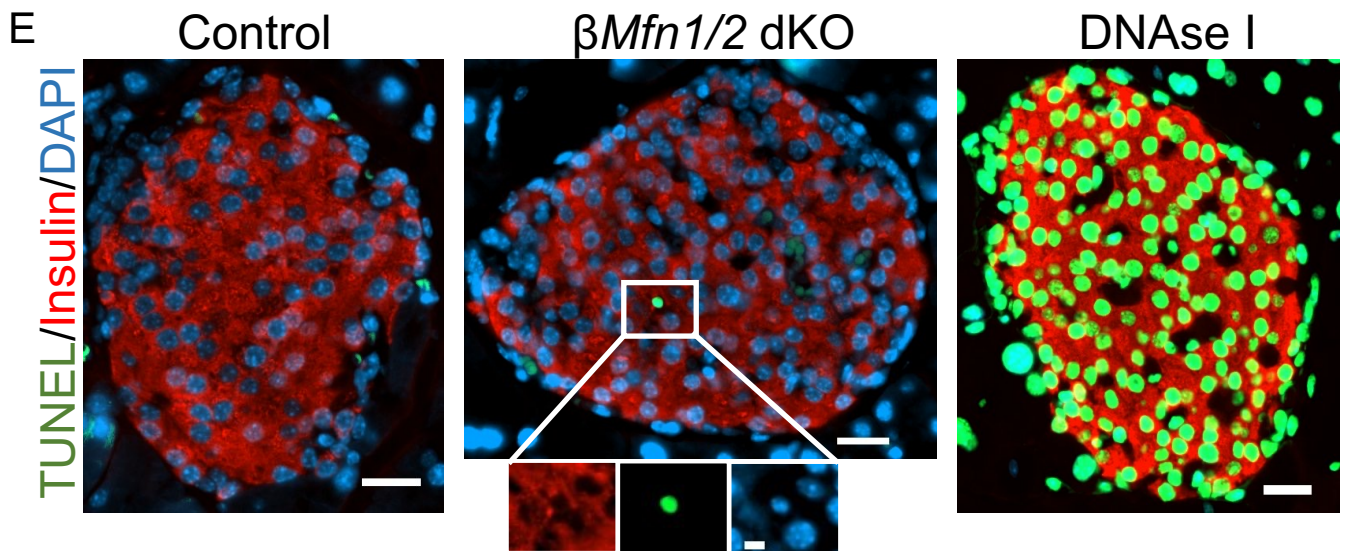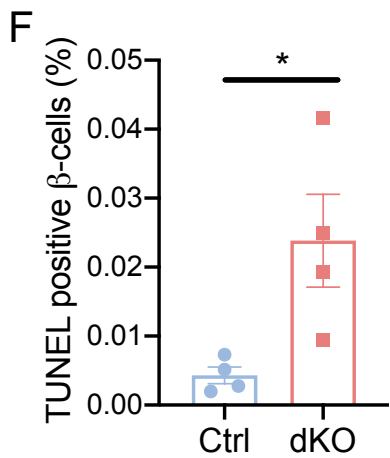

Fig.3



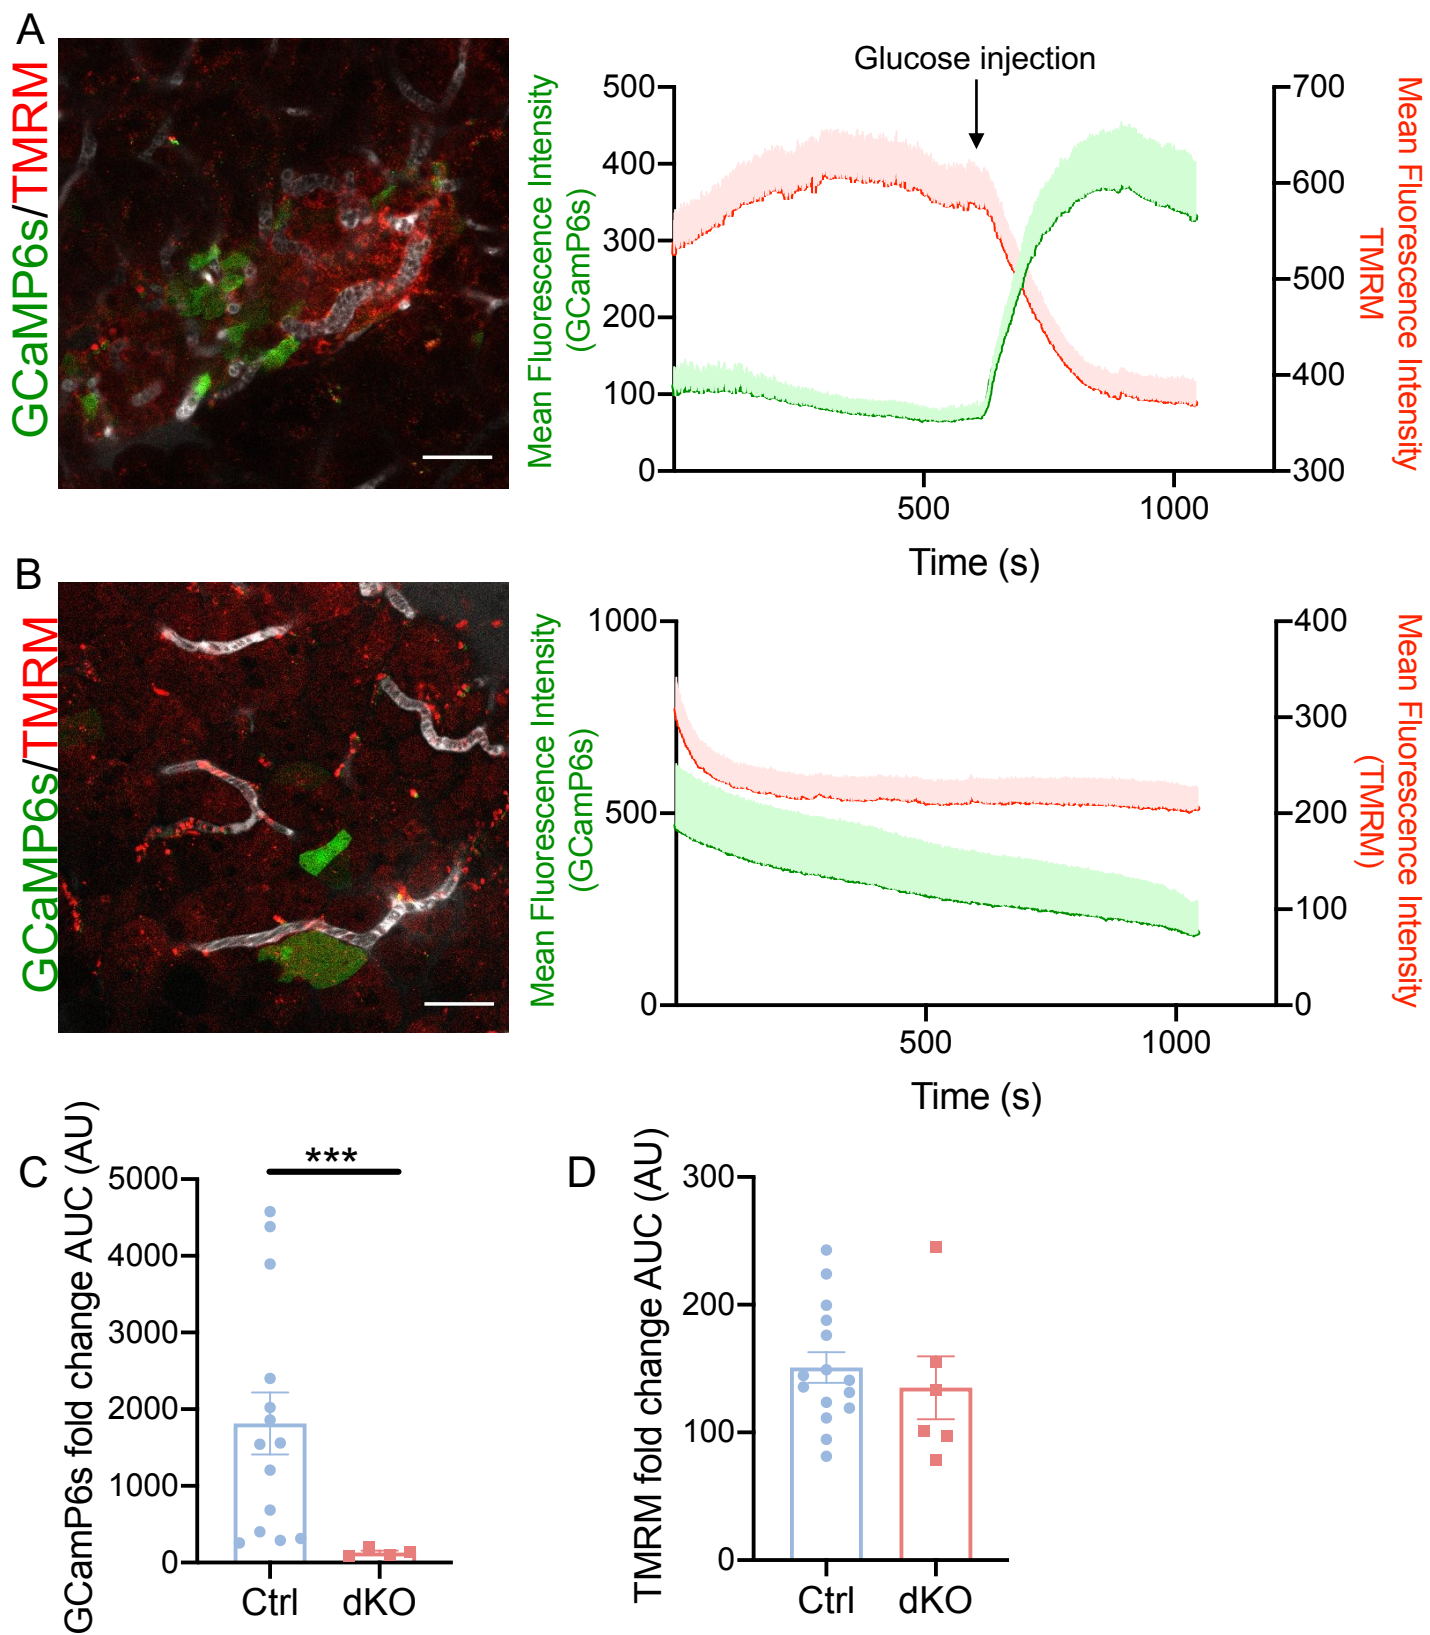

Fig.4

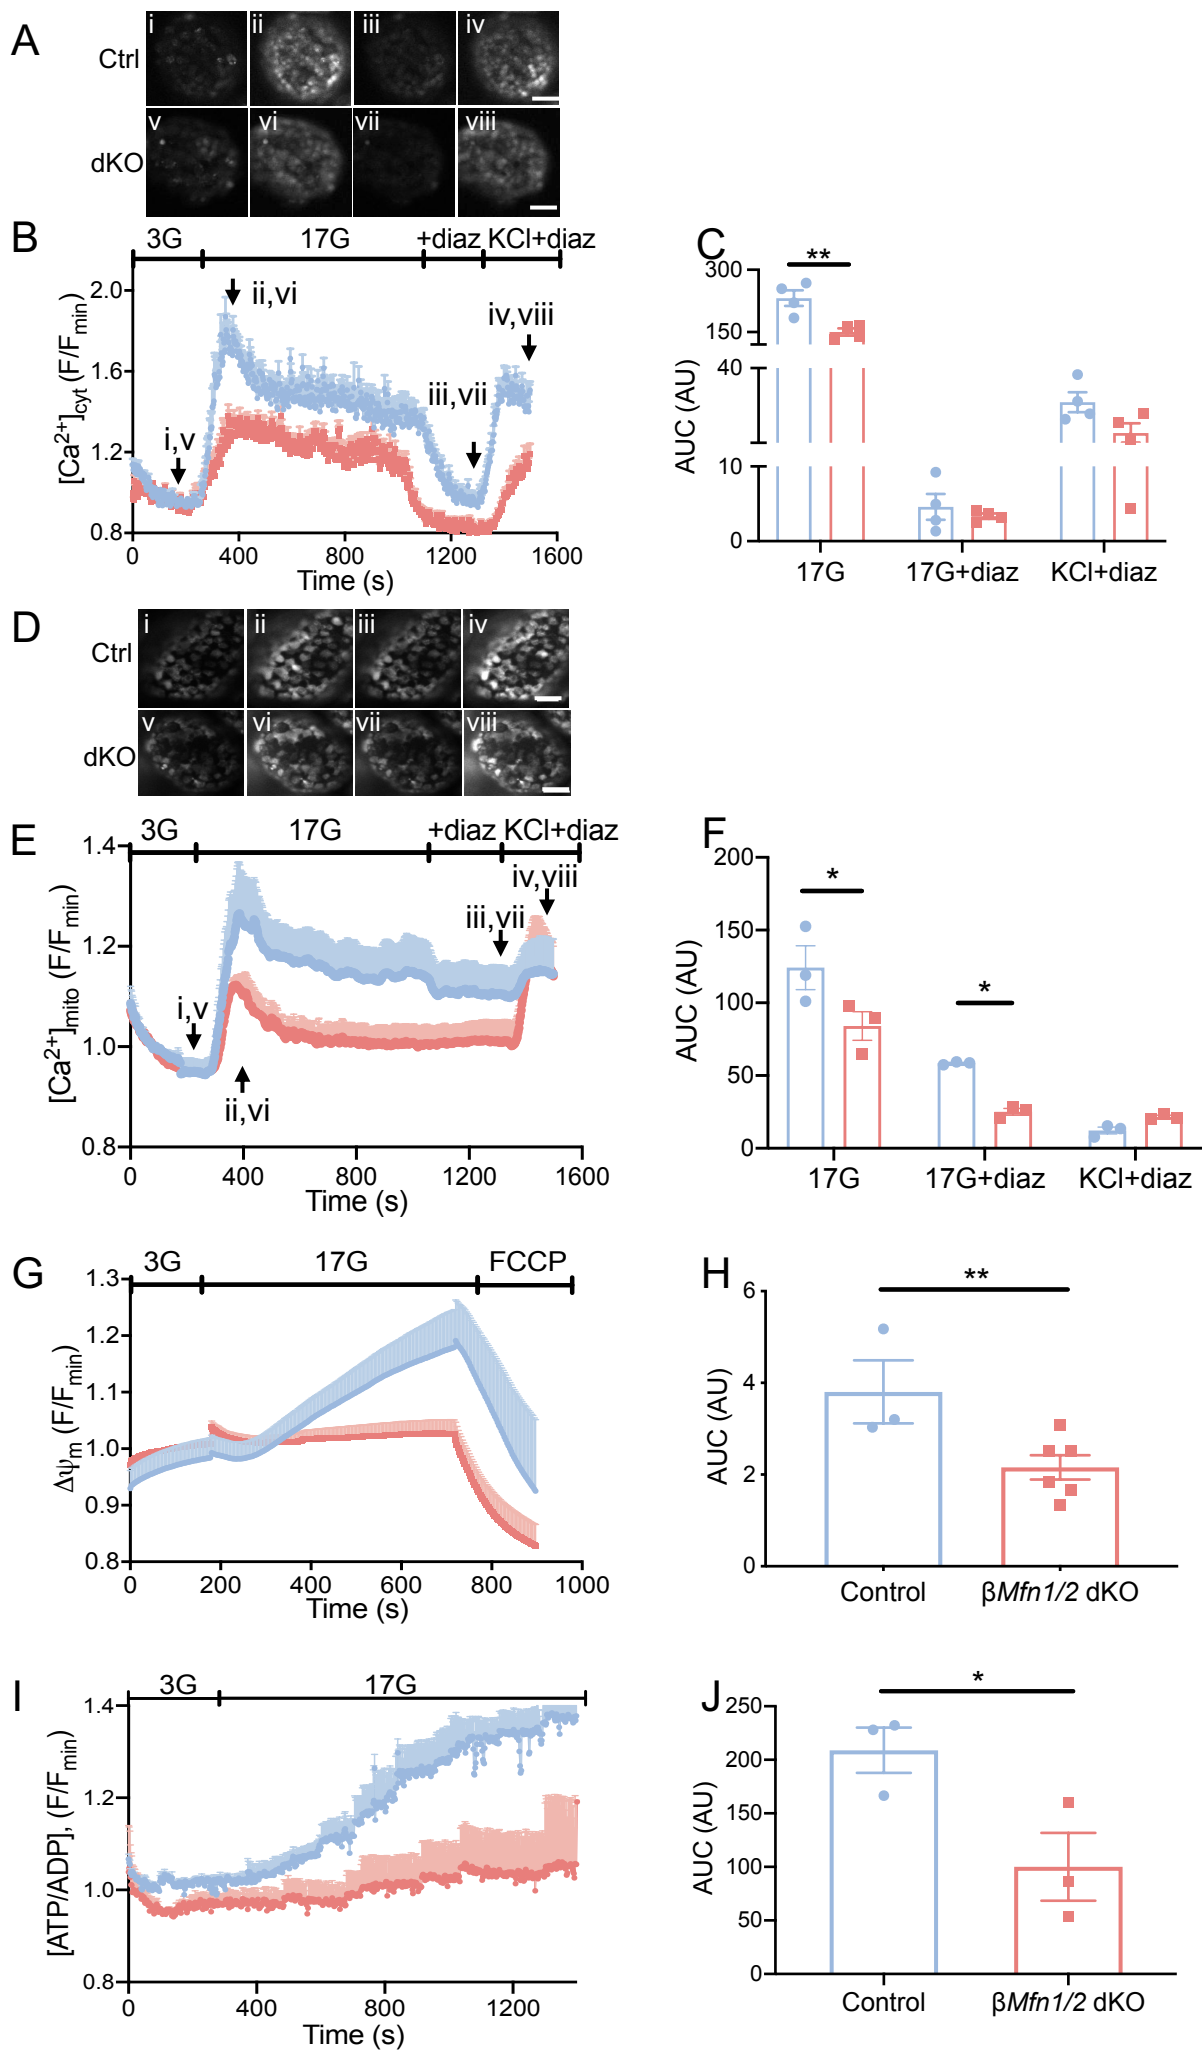

**Fig.5**

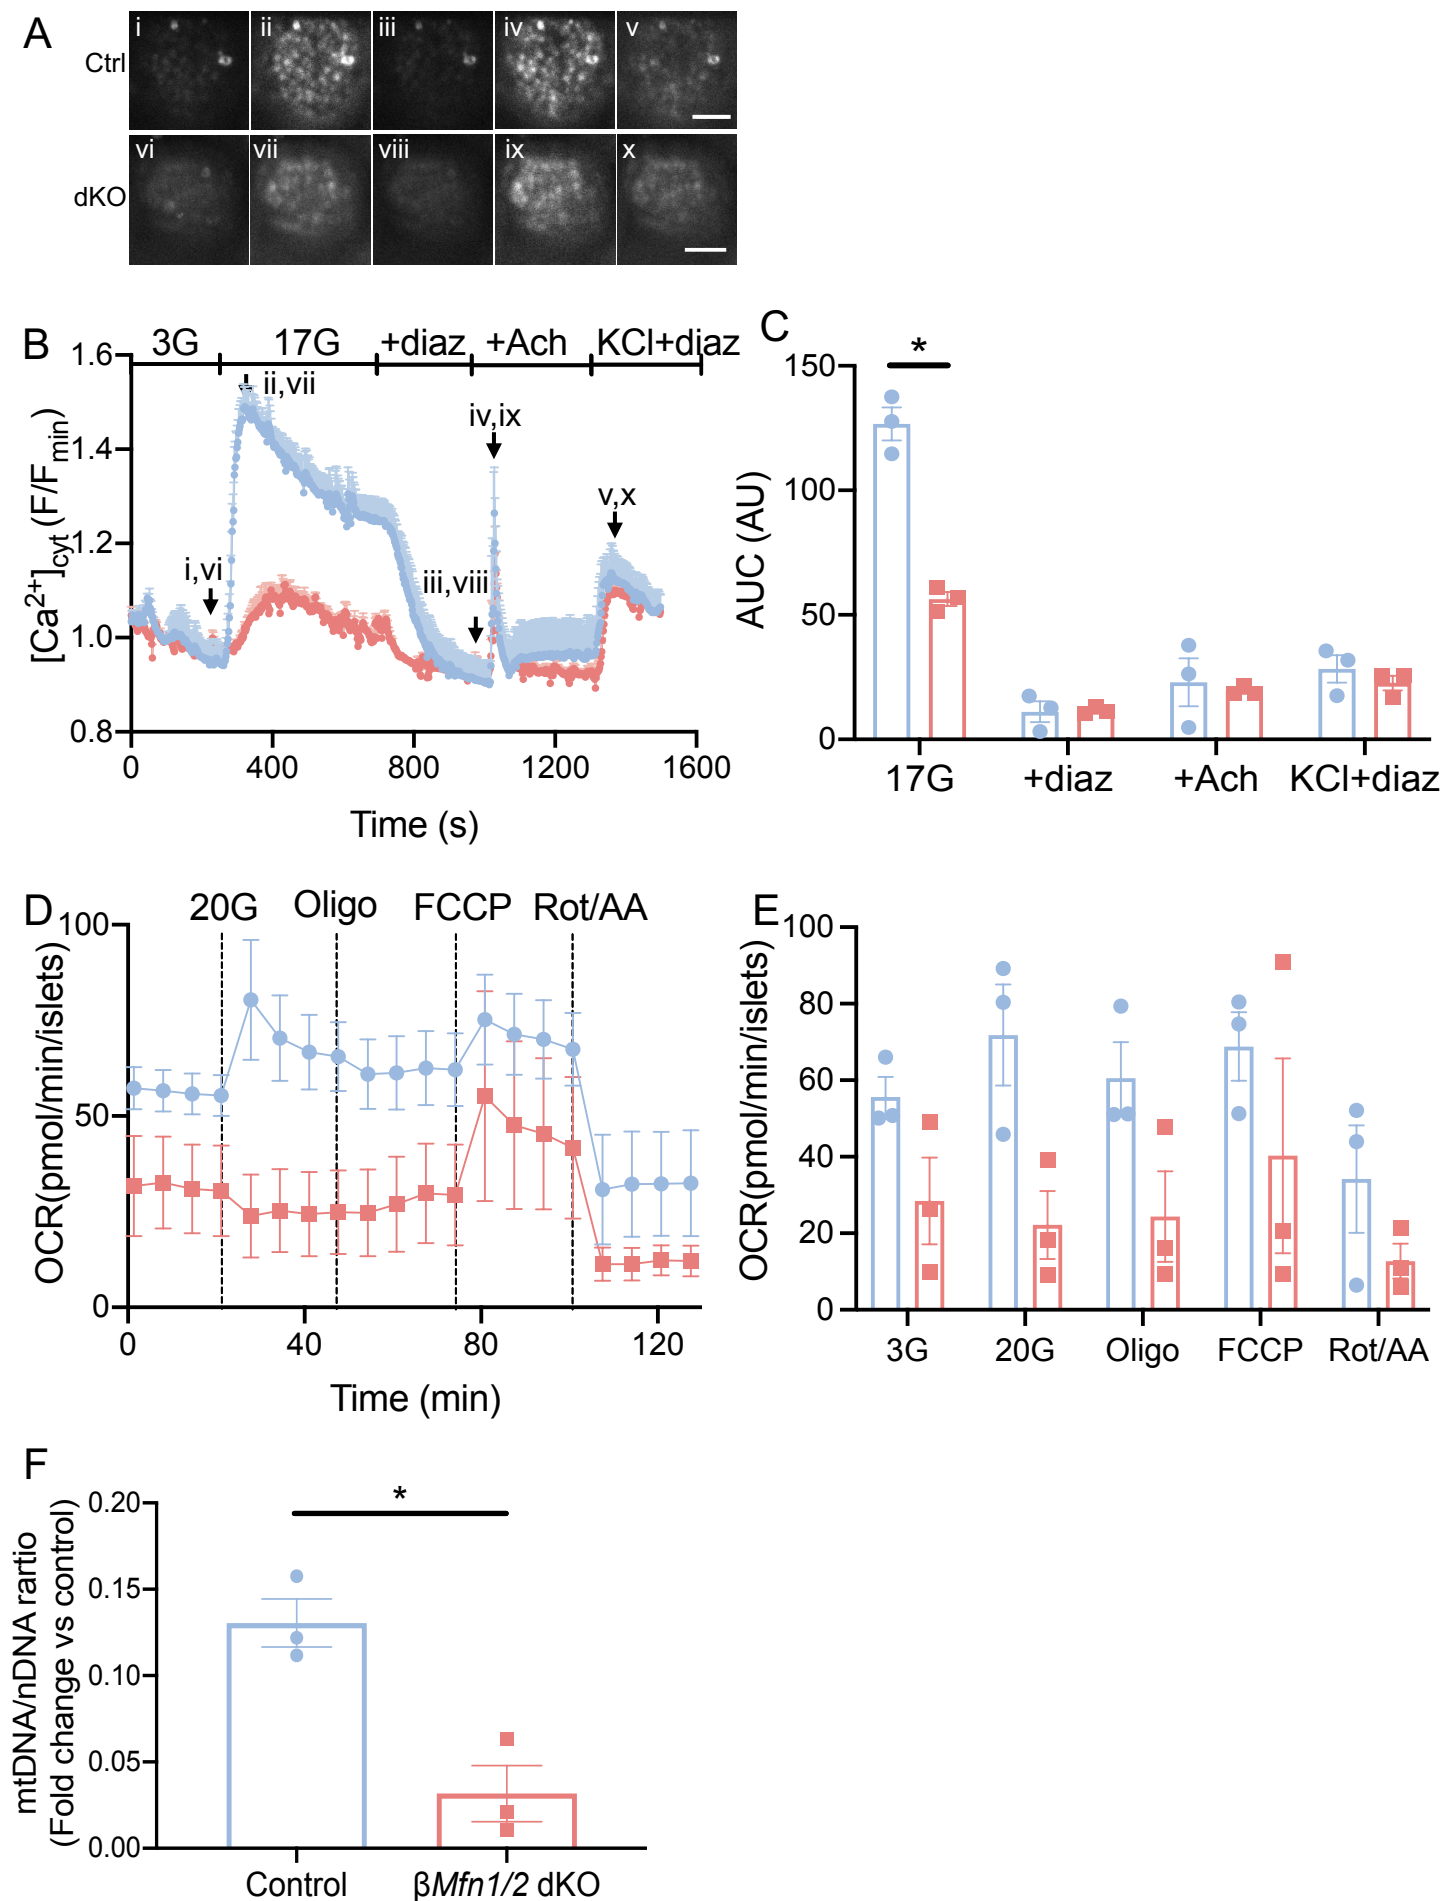

Fig.6

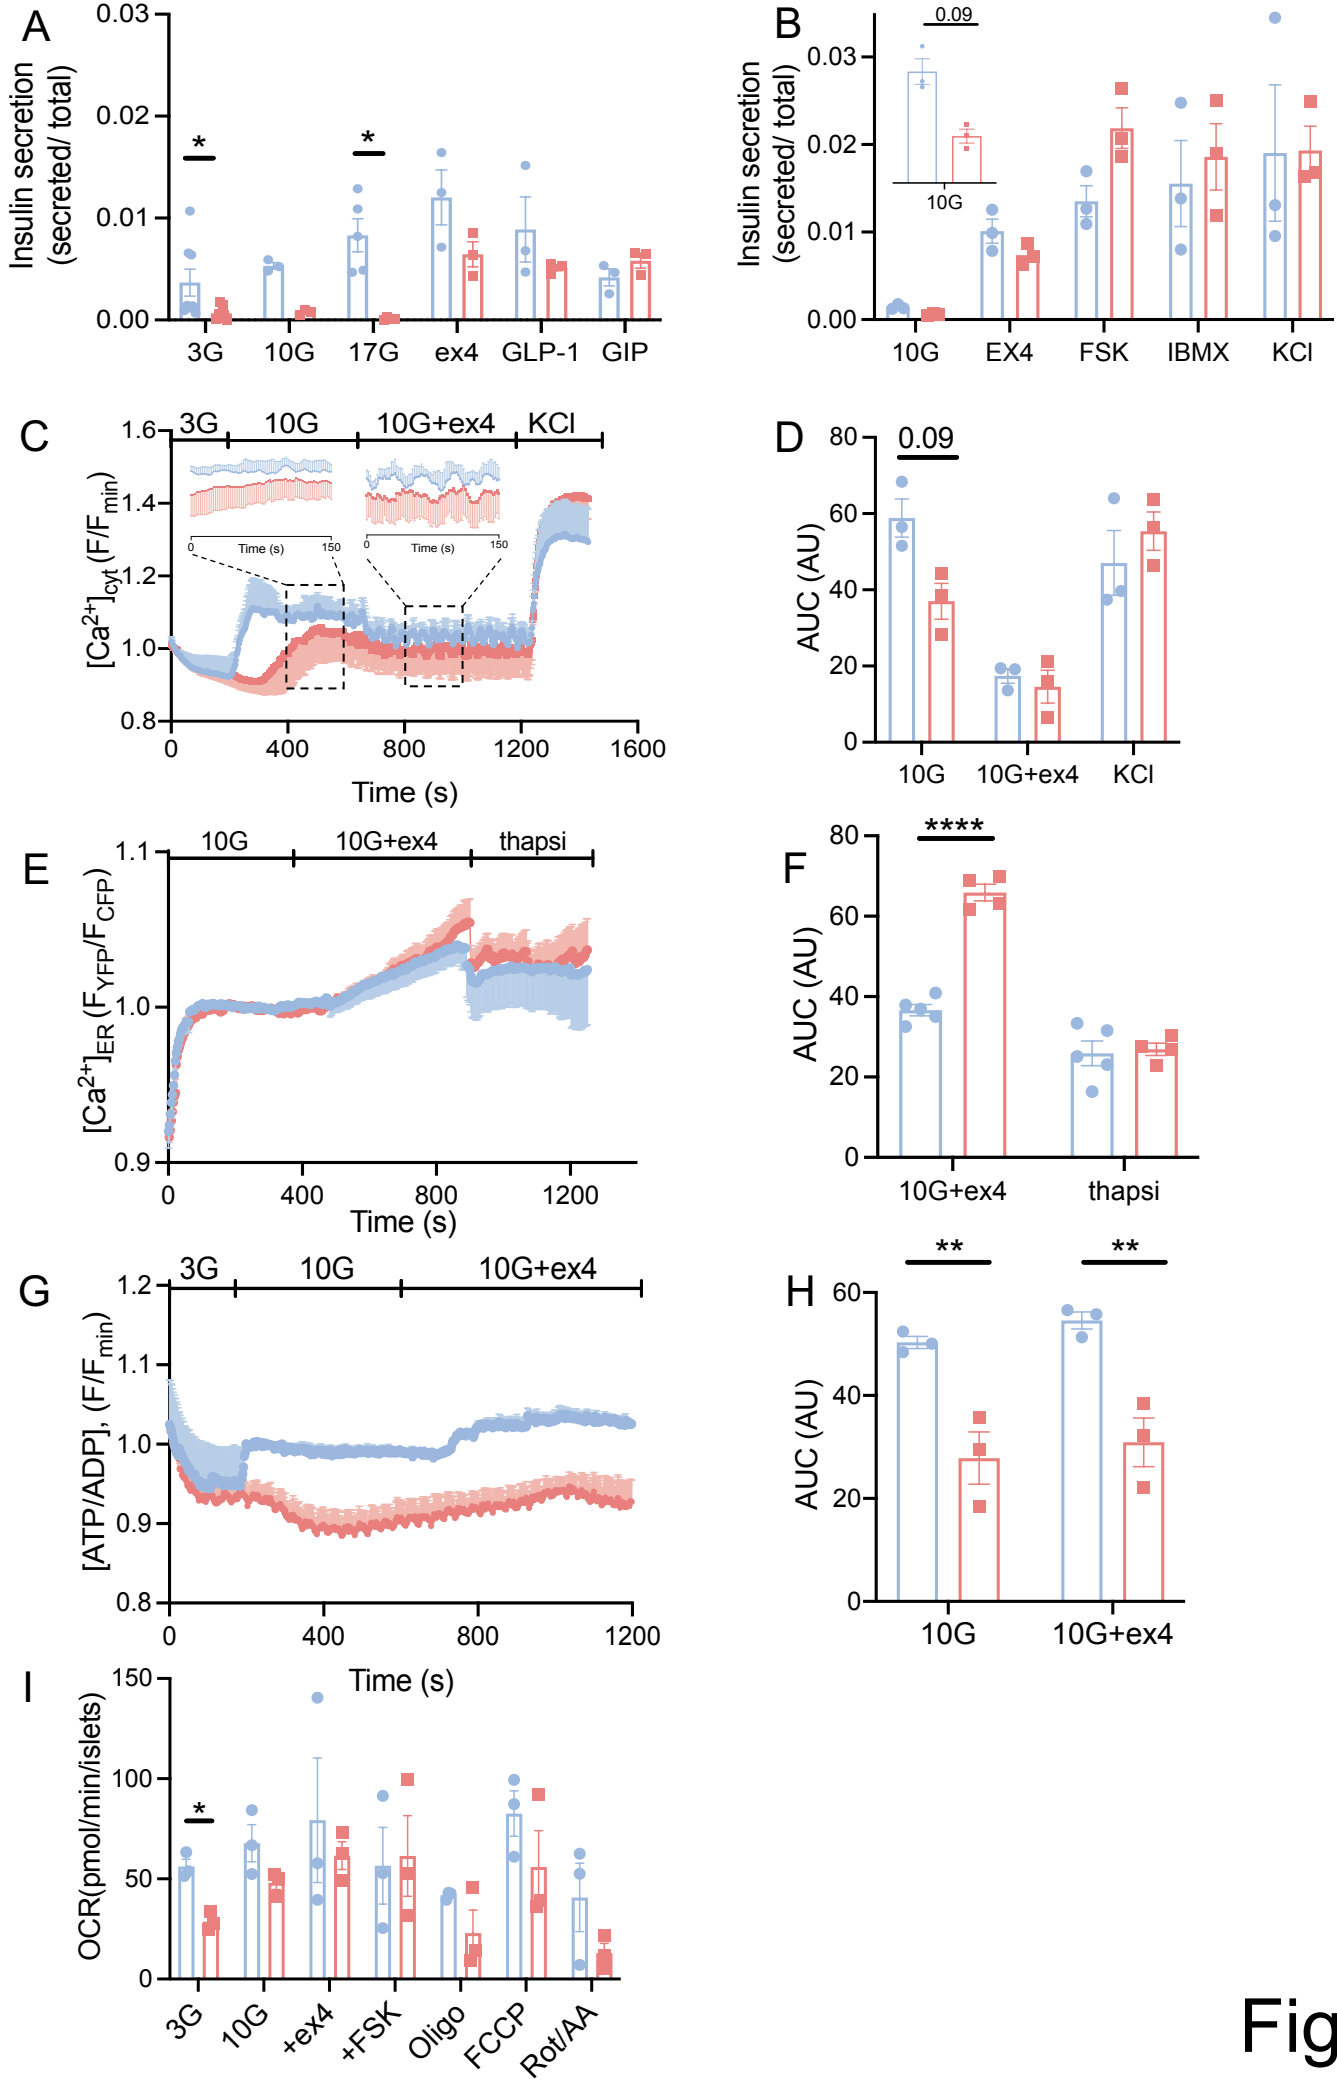

Fig.7

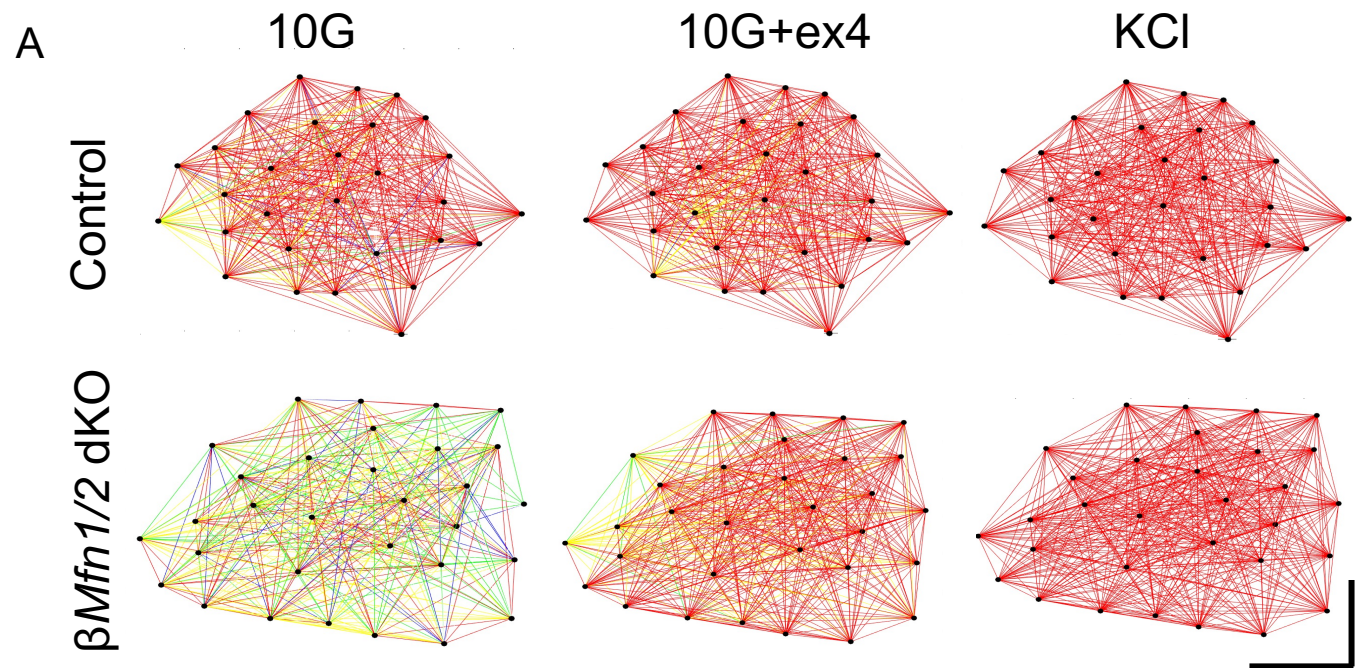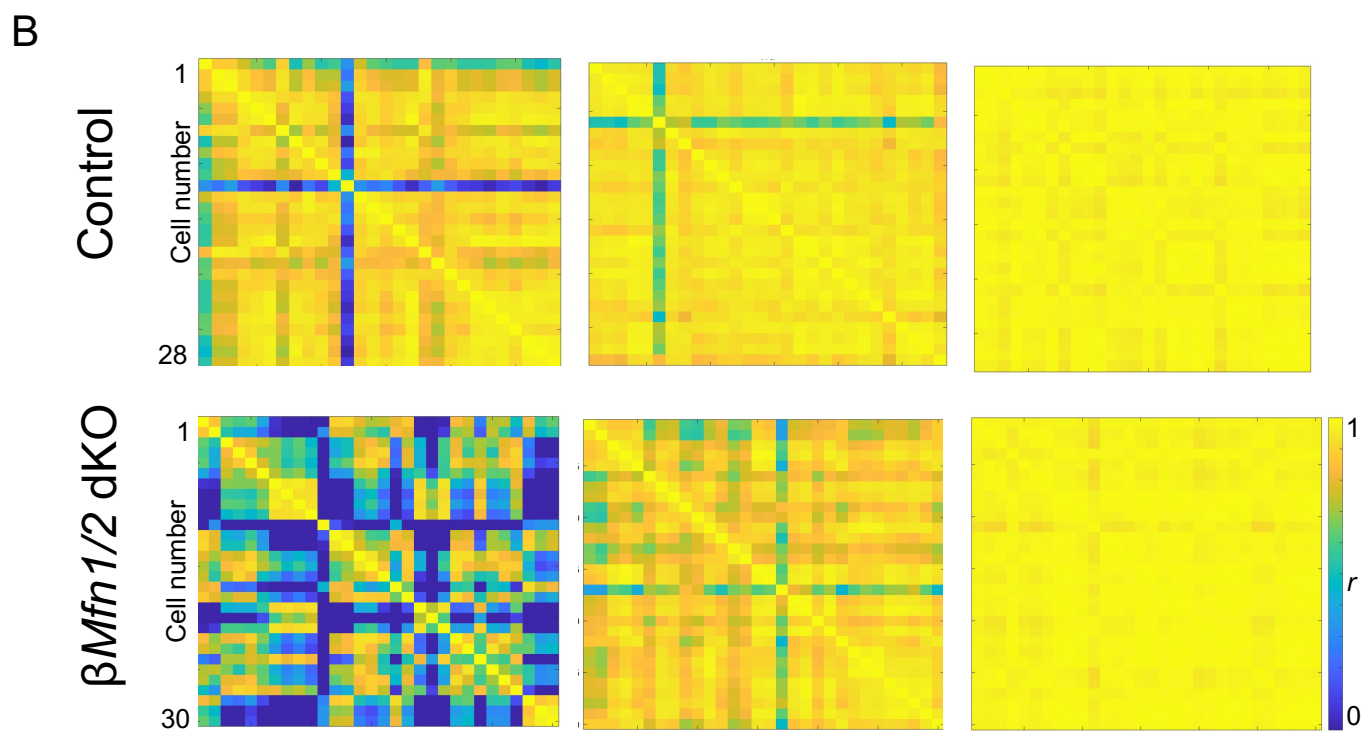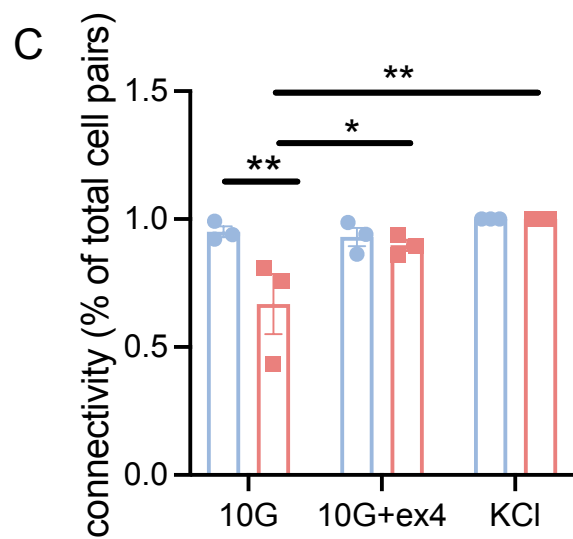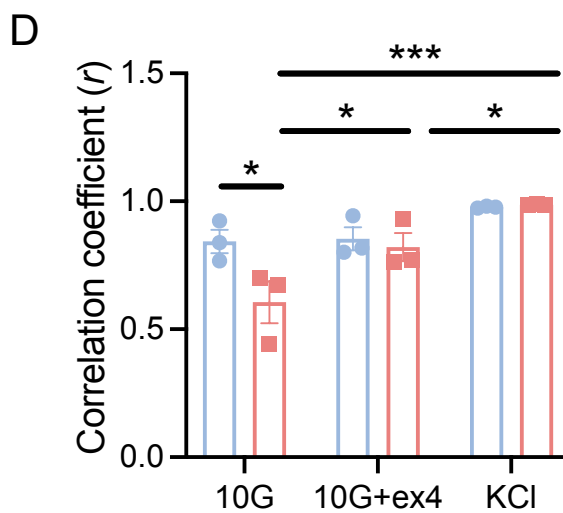

**Fig.8**

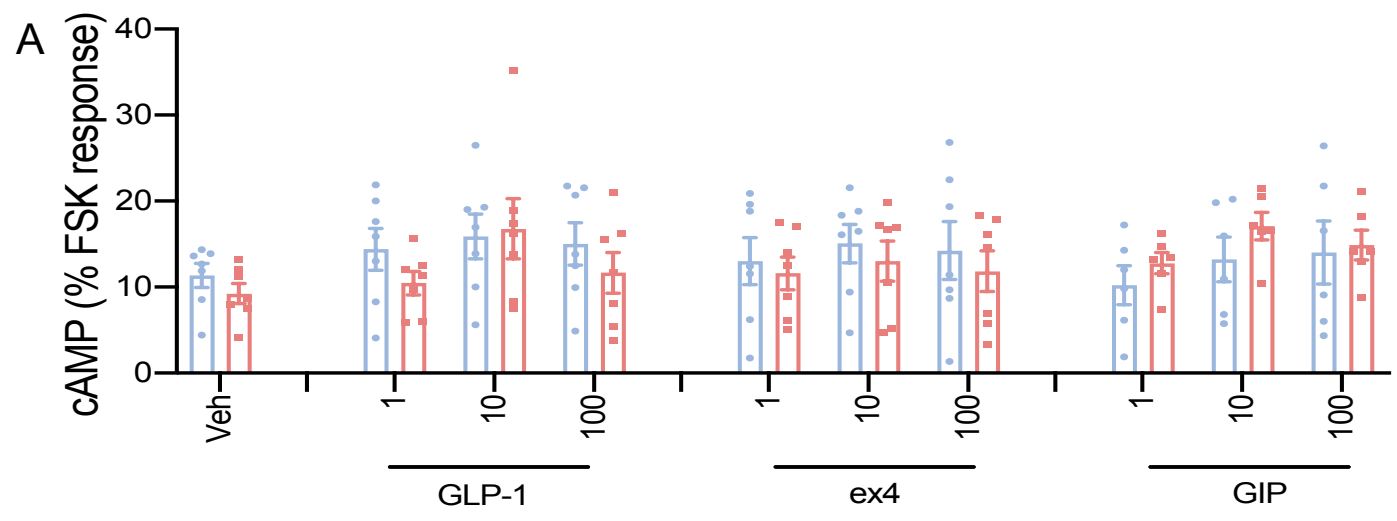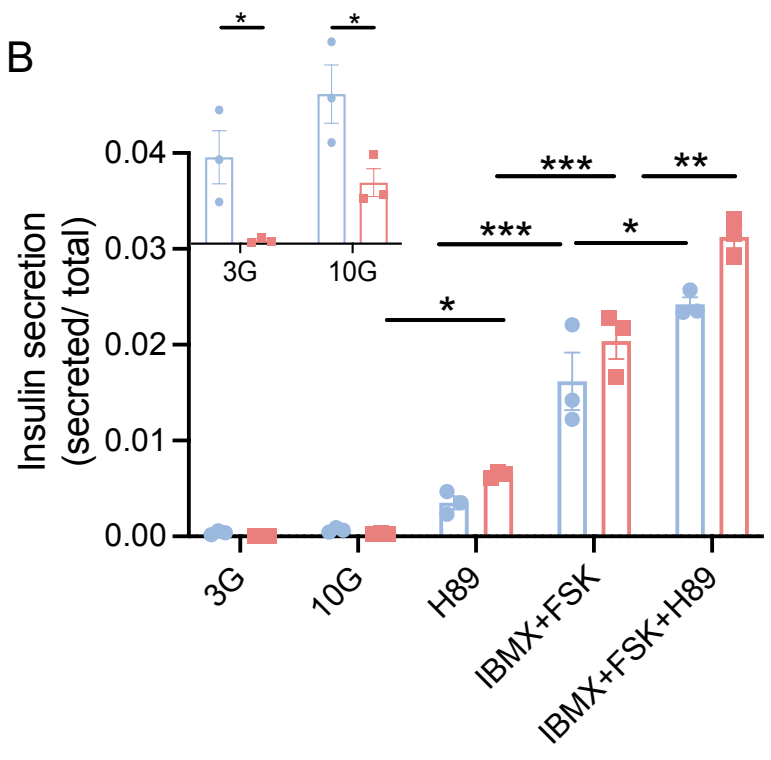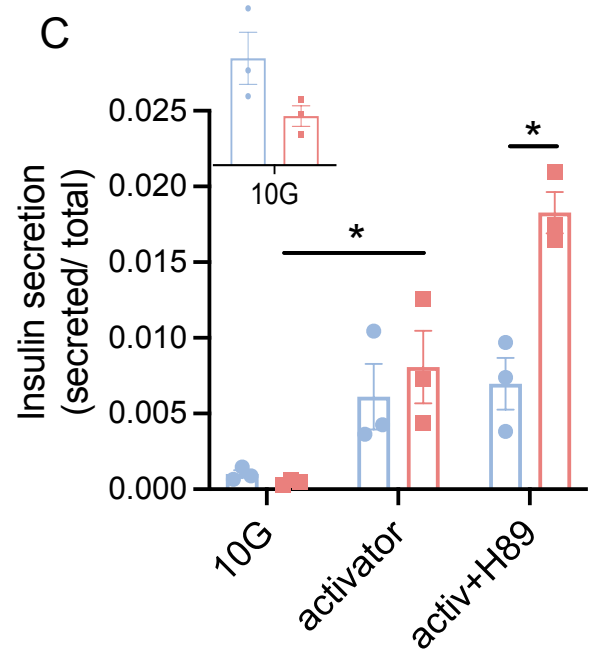

**Fig.9**
